# Supplementary material for: Factors affecting the identification of individual mountain bongo antelope
Source: PeerJ. 2015 Nov 12;3:e1303. doi: 10.7717/peerj.1303 (PMC4647597; doi:10.7717/peerj.1303)
Supplement: Supplemental Information 1 [file peerj-03-1303-s001.xlsx]

## Sheet: Image Trait Type
1S_2N_3F	Accuracy	Arc
1	0.875	1.20943
1	0.6625	0.950904
1	0.6	0.886077
1	0.7875	1.0917
1	0.9	1.24905
1	0.9125	1.2705
1	0.9125	1.2705
1	0.65	0.937744
1	0.8625	1.19092
1	0.95	1.34528
1	0.85	1.1731
1	0.8875	1.22876
1	0.95	1.34528
1	0.85	1.1731
1	0.675	0.964184
1	0.825	1.13919
1	0.9125	1.2705
1	0.9375	1.31812
1	0.9375	1.31812
1	0.975	1.41202
1	0.975	1.41202
1	0.5875	0.873351
1	0.975	1.41202
1	0.975	1.41202
1	0.7625	1.06176
1	0.825	1.13919
1	0.95	1.34528
1	0.425	0.710114
1	0.5	0.785398
1	0.8125	1.12296
1	0.8625	1.19092
1	0.9125	1.2705
1	0.7375	1.03288
1	0.775	1.07658
1	0.8375	1.15588
1	0.725	1.01878
1	0.8875	1.22876
1	0.8125	1.12296
1	0.875	1.20943
1	0.8125	1.12296
1	0.7375	1.03288
1	0.8875	1.22876
1	0.95	1.34528
1	0.925	1.29339
1	0.8	1.10715
1	0.875	1.20943
1	0.675	0.964184
1	0.7875	1.0917
1	0.925	1.29339
1	0.8	1.10715
1	0.8875	1.22876
1	0.9375	1.31812
1	0.75	1.0472
1	0.775	1.07658
1	0.5	0.785398
1	0.85	1.1731
1	0.7125	1.00488
1	0.975	1.41202
1	0.9125	1.2705
1	0.95	1.34528
1	0.875	1.20943
1	0.925	1.29339
1	1	1.5708
1	0.8	1.10715
1	0.8375	1.15588
1	0.9375	1.31812
1	0.7125	1.00488
1	0.9125	1.2705
1	0.8875	1.22876
1	0.95	1.34528
1	1	1.5708
1	0.825	1.13919
1	0.9125	1.2705
1	0.8625	1.19092
1	0.375	0.659058
1	0.85	1.1731
1	0.9125	1.2705
1	0.975	1.41202
1	0.85	1.1731
1	0.6625	0.950904
1	0.8125	1.12296
1	0.8375	1.15588
1	0.9	1.24905
1	0.725	1.01878
1	0.85	1.1731
1	0.7375	1.03288
1	0.8375	1.15588
1	0.9125	1.2705
1	0.8	1.10715
1	0.8	1.10715
1	0.4375	0.722734
1	0.8125	1.12296
1	0.875	1.20943
1	0.65	0.937744
1	0.9375	1.31812
1	0.8125	1.12296
1	0.8375	1.15588
1	0.8	1.10715
1	0.7875	1.0917
1	0.8	1.10715
1	0.875	1.20943
1	0.85	1.1731
1	0.8	1.10715
1	0.7625	1.06176
1	0.9	1.24905
1	0.5875	0.873351
1	0.8625	1.19092
1	0.9375	1.31812
1	0.975	1.41202
1	0.8	1.10715
1	0.7125	1.00488
1	0.9375	1.31812
1	0.6625	0.950904
1	0.65	0.937744
1	0.825	1.13919
1	0.9375	1.31812
1	0.9375	1.31812
1	0.6625	0.950904
1	0.95	1.34528
1	1	1.5708
1	0.8625	1.19092
1	0.7625	1.06176
1	0.9125	1.2705
1	0.7875	1.0917
1	0.75	1.0472
1	0.8375	1.15588
1	0.7625	1.06176
1	0.8	1.10715
1	0.8625	1.19092
1	1	1.5708
1	0.825	1.13919
1	0.625	0.911738
1	0.75	1.0472
1	0.6875	0.977597
1	0.85	1.1731
1	0.6125	0.89887
1	0.75	1.0472
1	0.8375	1.15588
1	0.9375	1.31812
1	0.775	1.07658
1	0.8	1.10715
1	0.8	1.10715
1	0.7875	1.0917
1	0.925	1.29339
1	0.95	1.34528
1	0.4875	0.772897
1	0.875	1.20943
1	0.9	1.24905
1	1	1.5708
1	0.475	0.760388
1	0.375	0.659058
1	0.75	1.0472
1	0.5	0.785398
1	0.6875	0.977597
1	0.675	0.964184
1	0.975	1.41202
1	0.8625	1.19092
1	1	1.5708
1	0.75	1.0472
1	0.825	1.13919
1	1	1.5708
1	0.8875	1.22876
1	0.8875	1.22876
1	0.8375	1.15588
1	0.925	1.29339
1	0.85	1.1731
1	0.9375	1.31812
1	0.75	1.0472
1	0.6125	0.89887
1	0.925	1.29339
1	0.9125	1.2705
1	0.9375	1.31812
1	0.7375	1.03288
1	0.95	1.34528
1	0.8625	1.19092
1	0.8625	1.19092
1	0.75	1.0472
1	0.6875	0.977597
1	0.7875	1.0917
1	0.825	1.13919
1	0.85	1.1731
1	0.75	1.0472
1	1	1.5708
1	0.8625	1.19092
1	0.8625	1.19092
1	0.65	0.937744
1	0.825	1.13919
1	0.8875	1.22876
1	1	1.5708
1	0.925	1.29339
1	1	1.5708
1	0.8375	1.15588
1	0.85	1.1731
1	0.7375	1.03288
1	1	1.5708
1	0.7875	1.0917
1	0.5	0.785398
1	1	1.5708
1	0.8	1.10715
1	0.8875	1.22876
1	0.85	1.1731
1	1	1.5708
1	1	1.5708
1	0.9125	1.2705
1	0.925	1.29339
1	0.775	1.07658
1	0.8375	1.15588
1	0.975	1.41202
1	0.9375	1.31812
1	0.9375	1.31812
1	0.95	1.34528
1	0.9375	1.31812
1	0.85	1.1731
1	0.7125	1.00488
1	0.9125	1.2705
1	0.9125	1.2705
1	0.9375	1.31812
1	0.975	1.41202
1	0.925	1.29339
1	1	1.5708
1	0.85	1.1731
1	0.85	1.1731
1	0.775	1.07658
1	0.7375	1.03288
1	0.975	1.41202
1	0.85	1.1731
1	0.7875	1.0917
2	0.975	1.41202
2	0.7375	1.03288
2	0.3625	0.646103
2	1	1.5708
2	0.8	1.10715
2	0.8	1.10715
2	0.925	1.29339
2	0.8625	1.19092
2	0.9	1.24905
2	0.9125	1.2705
2	0.9375	1.31812
2	0.8	1.10715
2	0.9125	1.2705
2	0.825	1.13919
2	0.725	1.01878
2	0.825	1.13919
2	0.95	1.34528
2	0.975	1.41202
2	1	1.5708
2	0.825	1.13919
2	0.8625	1.19092
2	0.9125	1.2705
2	0.95	1.34528
2	0.8625	1.19092
2	0.7625	1.06176
2	0.8125	1.12296
2	0.825	1.13919
2	0.475	0.760388
2	0.775	1.07658
2	0.725	1.01878
2	0.8875	1.22876
2	0.825	1.13919
2	0.6125	0.89887
2	0.7375	1.03288
2	0.7125	1.00488
2	0.825	1.13919
2	0.7875	1.0917
2	0.7625	1.06176
2	0.875	1.20943
2	0.925	1.29339
2	0.8625	1.19092
2	0.7875	1.0917
2	0.8125	1.12296
2	0.975	1.41202
2	0.8375	1.15588
2	0.9375	1.31812
2	0.775	1.07658
2	0.85	1.1731
2	0.9375	1.31812
2	0.8	1.10715
2	0.8625	1.19092
2	0.9125	1.2705
2	0.85	1.1731
2	0.7625	1.06176
2	0.8125	1.12296
2	0.95	1.34528
2	0.775	1.07658
2	1	1.5708
2	1	1.5708
2	0.9125	1.2705
2	0.725	1.01878
2	0.9125	1.2705
2	0.975	1.41202
2	0.8125	1.12296
2	0.8375	1.15588
2	1	1.5708
2	0.925	1.29339
2	0.9125	1.2705
2	0.7125	1.00488
2	0.975	1.41202
2	0.9375	1.31812
2	0.7625	1.06176
2	0.8625	1.19092
2	0.85	1.1731
2	0.5125	0.797899
2	0.875	1.20943
2	0.975	1.41202
2	0.975	1.41202
2	0.975	1.41202
2	0.725	1.01878
2	0.7375	1.03288
2	0.9	1.24905
2	0.9375	1.31812
2	0.775	1.07658
2	0.7125	1.00488
2	0.9125	1.2705
2	0.8875	1.22876
2	0.975	1.41202
2	0.85	1.1731
2	0.95	1.34528
2	0.375	0.659058
2	0.9375	1.31812
2	0.9125	1.2705
2	0.8125	1.12296
2	0.975	1.41202
2	0.975	1.41202
2	0.775	1.07658
2	0.9375	1.31812
2	0.7625	1.06176
2	0.6375	0.924693
2	0.9125	1.2705
2	0.8875	1.22876
2	0.6	0.886077
2	0.8875	1.22876
2	0.825	1.13919
2	0.8	1.10715
2	0.7375	1.03288
2	0.9	1.24905
2	0.8625	1.19092
2	0.975	1.41202
2	0.5375	0.822933
2	0.975	1.41202
2	0.925	1.29339
2	0.775	1.07658
2	0.9125	1.2705
2	0.975	1.41202
2	0.825	1.13919
2	0.8	1.10715
2	0.85	1.1731
2	1	1.5708
2	0.975	1.41202
2	0.975	1.41202
2	0.75	1.0472
2	0.85	1.1731
2	0.8875	1.22876
2	0.8375	1.15588
2	0.8625	1.19092
2	0.8625	1.19092
2	0.875	1.20943
2	0.975	1.41202
2	0.85	1.1731
2	0.6	0.886077
2	0.925	1.29339
2	0.8	1.10715
2	0.8	1.10715
2	0.7	0.991157
2	0.525	0.810409
2	0.8625	1.19092
2	0.95	1.34528
2	0.7375	1.03288
2	0.7875	1.0917
2	0.7875	1.0917
2	0.75	1.0472
2	0.6375	0.924693
2	0.775	1.07658
2	0.4875	0.772897
2	0.9125	1.2705
2	1	1.5708
2	1	1.5708
2	0.4875	0.772897
2	0.725	1.01878
2	0.6125	0.89887
2	0.525	0.810409
2	0.8875	1.22876
2	0.625	0.911738
2	0.975	1.41202
2	0.825	1.13919
2	1	1.5708
2	0.7625	1.06176
2	0.8625	1.19092
2	1	1.5708
2	0.9125	1.2705
2	0.9125	1.2705
2	0.975	1.41202
2	0.8125	1.12296
2	0.8625	1.19092
2	0.9125	1.2705
2	0.825	1.13919
2	0.8375	1.15588
2	0.8375	1.15588
2	0.8125	1.12296
2	0.9125	1.2705
2	0.8625	1.19092
2	0.775	1.07658
2	1	1.5708
2	0.7125	1.00488
2	0.825	1.13919
2	0.7125	1.00488
2	0.8875	1.22876
2	1	1.5708
2	0.85	1.1731
2	0.8625	1.19092
2	0.8875	1.22876
2	0.9125	1.2705
2	0.8375	1.15588
2	0.8375	1.15588
2	0.8625	1.19092
2	0.875	1.20943
2	0.8875	1.22876
2	0.8375	1.15588
2	0.95	1.34528
2	0.85	1.1731
2	0.8875	1.22876
2	0.975	1.41202
2	0.9375	1.31812
2	0.7875	1.0917
2	0.575	0.860682
2	0.975	1.41202
2	0.7875	1.0917
2	0.8125	1.12296
2	1	1.5708
2	0.925	1.29339
2	0.975	1.41202
2	0.9375	1.31812
2	0.875	1.20943
2	0.7875	1.0917
2	0.7375	1.03288
2	0.9125	1.2705
2	0.9125	1.2705
2	1	1.5708
2	0.8	1.10715
2	1	1.5708
2	0.975	1.41202
2	0.7125	1.00488
2	0.8625	1.19092
2	1	1.5708
2	0.9125	1.2705
2	0.975	1.41202
2	0.8875	1.22876
2	1	1.5708
2	0.95	1.34528
2	0.9125	1.2705
2	0.8625	1.19092
2	0.9	1.24905
2	0.9125	1.2705
2	0.875	1.20943
2	0.9125	1.2705
3	0.6375	0.924693
3	0.5875	0.873351
3	0.55	0.835482
3	0.775	1.07658
3	0.7	0.991157
3	0.7	0.991157
3	0.7125	1.00488
3	0.7125	1.00488
3	0.6	0.886077
3	0.8125	1.12296
3	0.8625	1.19092
3	0.65	0.937744
3	0.7875	1.0917
3	0.7625	1.06176
3	0.675	0.964184
3	0.7125	1.00488
3	0.8875	1.22876
3	0.8875	1.22876
3	0.65	0.937744
3	0.7875	1.0917
3	0.775	1.07658
3	0.525	0.810409
3	0.7875	1.0917
3	0.8875	1.22876
3	0.725	1.01878
3	0.6875	0.977597
3	0.65	0.937744
3	0.5875	0.873351
3	0.575	0.860682
3	0.5875	0.873351
3	0.7625	1.06176
3	0.725	1.01878
3	0.6875	0.977597
3	0.6875	0.977597
3	0.6	0.886077
3	0.8	1.10715
3	0.55	0.835482
3	0.675	0.964184
3	0.8125	1.12296
3	0.5625	0.848062
3	0.725	1.01878
3	0.65	0.937744
3	0.7625	1.06176
3	0.6625	0.950904
3	0.6875	0.977597
3	0.55	0.835482
3	0.725	1.01878
3	0.775	1.07658
3	0.775	1.07658
3	0.7625	1.06176
3	0.75	1.0472
3	0.7625	1.06176
3	0.825	1.13919
3	0.6625	0.950904
3	0.75	1.0472
3	0.8375	1.15588
3	0.7875	1.0917
3	0.825	1.13919
3	0.8625	1.19092
3	0.8375	1.15588
3	0.725	1.01878
3	0.675	0.964184
3	0.825	1.13919
3	0.8125	1.12296
3	0.675	0.964184
3	0.7375	1.03288
3	0.7375	1.03288
3	0.8625	1.19092
3	0.9125	1.2705
3	0.675	0.964184
3	0.7625	1.06176
3	0.7875	1.0917
3	0.8875	1.22876
3	0.8375	1.15588
3	0.675	0.964184
3	0.7375	1.03288
3	0.7875	1.0917
3	0.95	1.34528
3	0.8	1.10715
3	0.7625	1.06176
3	0.725	1.01878
3	0.825	1.13919
3	0.95	1.34528
3	0.8	1.10715
3	0.7125	1.00488
3	0.7375	1.03288
3	0.675	0.964184
3	0.85	1.1731
3	0.6	0.886077
3	0.6875	0.977597
3	0.225	0.494216
3	0.9	1.24905
3	0.725	1.01878
3	0.625	0.911738
3	0.825	1.13919
3	0.725	1.01878
3	0.675	0.964184
3	0.8	1.10715
3	0.8	1.10715
3	0.6875	0.977597
3	0.8125	1.12296
3	0.6	0.886077
3	0.6625	0.950904
3	0.875	1.20943
3	0.7125	1.00488
3	0.525	0.810409
3	0.6375	0.924693
3	0.725	1.01878
3	0.6625	0.950904
3	0.6375	0.924693
3	0.6625	0.950904
3	0.825	1.13919
3	0.7625	1.06176
3	0.725	1.01878
3	0.775	1.07658
3	0.8125	1.12296
3	0.55	0.835482
3	0.8375	1.15588
3	0.7875	1.0917
3	0.825	1.13919
3	0.8875	1.22876
3	0.7375	1.03288
3	0.85	1.1731
3	0.7	0.991157
3	0.725	1.01878
3	0.75	1.0472
3	0.8125	1.12296
3	0.7125	1.00488
3	0.6125	0.89887
3	0.6875	0.977597
3	0.8625	1.19092
3	0.35	0.633052
3	0.8375	1.15588
3	0.7625	1.06176
3	0.6875	0.977597
3	0.4625	0.747863
3	0.575	0.860682
3	0.75	1.0472
3	0.65	0.937744
3	0.85	1.1731
3	0.7	0.991157
3	0.675	0.964184
3	0.6125	0.89887
3	0.7375	1.03288
3	0.6875	0.977597
3	0.4375	0.722734
3	0.425	0.710114
3	0.625	0.911738
3	0.7375	1.03288
3	0.525	0.810409
3	0.7625	1.06176
3	0.6375	0.924693
3	0.525	0.810409
3	0.675	0.964184
3	0.75	1.0472
3	0.75	1.0472
3	0.725	1.01878
3	0.725	1.01878
3	0.725	1.01878
3	0.8	1.10715
3	0.9	1.24905
3	0.6875	0.977597
3	0.5875	0.873351
3	0.7875	1.0917
3	0.7375	1.03288
3	0.825	1.13919
3	0.7375	1.03288
3	0.55	0.835482
3	0.65	0.937744
3	0.7375	1.03288
3	0.6875	0.977597
3	0.85	1.1731
3	0.6125	0.89887
3	0.75	1.0472
3	0.7375	1.03288
3	0.7625	1.06176
3	0.7	0.991157
3	0.6375	0.924693
3	0.75	1.0472
3	0.7875	1.0917
3	0.7375	1.03288
3	0.8625	1.19092
3	0.625	0.911738
3	0.65	0.937744
3	0.6625	0.950904
3	0.775	1.07658
3	0.6375	0.924693
3	0.7375	1.03288
3	0.7	0.991157
3	0.825	1.13919
3	0.7375	1.03288
3	0.7875	1.0917
3	0.8875	1.22876
3	0.8	1.10715
3	0.8625	1.19092
3	0.8375	1.15588
3	0.5375	0.822933
3	0.625	0.911738
3	0.65	0.937744
3	0.6875	0.977597
3	0.8375	1.15588
3	0.5125	0.797899
3	0.5625	0.848062
3	0.7375	1.03288
3	0.775	1.07658
3	0.9	1.24905
3	0.575	0.860682
3	0.775	1.07658
3	0.8625	1.19092
3	0.8625	1.19092
3	0.75	1.0472
3	0.675	0.964184
3	0.875	1.20943
3	0.8375	1.15588
3	0.8125	1.12296
3	0.8125	1.12296
3	0.8875	1.22876
3	0.8	1.10715
3	0.8375	1.15588
3	0.7375	1.03288
3	0.7625	1.06176
3	0.7375	1.03288
3	0.725	1.01878
3	0.7875	1.0917
3	0.8125	1.12296
3	0.8375	1.15588
3	0.575	0.860682

## Sheet: Different Image Sources
Camera Trap	Captive		Camera 1	Camera 2		Camera 1	Camera 2
0	0.866667		0.866667	0.791667		1.197	1.09681
0	0.616667		0.616667	0.708333		0.90315	1.00029
0	0.633333		0.633333	0.375		0.920365	0.659058
0	0.916667		0.916667	0.791667		1.27795	1.09681
0	0.766667		0.766667	0.833333		1.06667	1.15026
0	0.816667		0.816667	0.791667		1.12832	1.09681
0	0.866667		0.866667	0.833333		1.197	1.15026
0	0.816667		0.816667	0.666667		1.12832	0.955317
0	0.783333		0.783333	0.791667		1.08663	1.09681
0	0.866667		0.866667	0.916667		1.197	1.27795
0	0.933333		0.933333	0.833333		1.30964	1.15026
0	0.85		0.85	0.708333		1.1731	1.00029
0	0.85		0.85	0.916667		1.1731	1.27795
0	0.833333		0.833333	0.791667		1.15026	1.09681
0	0.633333		0.633333	0.75		0.920365	1.0472
0	0.866667		0.866667	0.708333		1.197	1.00029
0	0.916667		0.916667	0.916667		1.27795	1.27795
0	0.95		0.95	0.916667		1.34528	1.27795
0	0.933333		0.933333	0.791667		1.30964	1.09681
0	0.85		0.85	0.875		1.1731	1.20943
0	0.866667		0.866667	0.875		1.197	1.20943
0	0.766667		0.766667	0.583333		1.06667	0.869122
0	0.933333		0.933333	0.875		1.30964	1.20943
0	0.9		0.9	0.916667		1.24905	1.27795
0	0.833333		0.833333	0.666667		1.15026	0.955317
0	0.8		0.8	0.75		1.10715	1.0472
0	0.866667		0.866667	0.75		1.197	1.0472
0	0.533333		0.533333	0.458333		0.818756	0.743683
0	0.733333		0.733333	0.5		1.02816	0.785398
0	0.666667		0.666667	0.75		0.955317	1.0472
0	0.8		0.8	0.875		1.10715	1.20943
0	0.85		0.85	0.791667		1.1731	1.09681
0	0.733333		0.733333	0.625		1.02816	0.911738
0	0.8		0.8	0.666667		1.10715	0.955317
0	0.766667		0.766667	0.666667		1.06667	0.955317
0	0.816667		0.816667	0.75		1.12832	1.0472
0	0.733333		0.733333	0.75		1.02816	1.0472
0	0.75		0.75	0.75		1.0472	1.0472
0	0.75		0.75	0.958333		1.0472	1.36523
0	0.783333		0.783333	0.75		1.08663	1.0472
0	0.8		0.8	0.75		1.10715	1.0472
0	0.716667		0.716667	0.833333		1.00949	1.15026
0	0.766667		0.766667	0.916667		1.06667	1.27795
0	0.833333		0.833333	0.875		1.15026	1.20943
0	0.8		0.8	0.75		1.10715	1.0472
0	0.866667		0.866667	0.708333		1.197	1.00029
0	0.7		0.7	0.75		0.991157	1.0472
0	0.9		0.9	0.708333		1.24905	1.00029
0	0.883333		0.883333	0.875		1.22221	1.20943
0	0.783333		0.783333	0.791667		1.08663	1.09681
0	0.833333		0.833333	0.833333		1.15026	1.15026
0	0.95		0.95	0.791667		1.34528	1.09681
0	0.7		0.7	0.916667		0.991157	1.27795
0	0.8		0.8	0.666667		1.10715	0.955317
0	0.666667		0.666667	0.708333		0.955317	1.00029
0	0.883333		0.883333	0.875		1.22221	1.20943
0	0.766667		0.766667	0.75		1.06667	1.0472
0	0.95		0.95	0.916667		1.34528	1.27795
0	0.933333		0.933333	0.916667		1.30964	1.27795
0	0.883333		0.883333	0.916667		1.22221	1.27795
0	0.8		0.8	0.75		1.10715	1.0472
0	0.883333		0.883333	0.791667		1.22221	1.09681
0	0.95		0.95	0.916667		1.34528	1.27795
0	0.783333		0.783333	0.833333		1.08663	1.15026
0	0.733333		0.733333	0.833333		1.02816	1.15026
0	0.95		0.95	0.833333		1.34528	1.15026
0	0.75		0.75	0.833333		1.0472	1.15026
0	0.916667		0.916667	0.875		1.27795	1.20943
0	0.883333		0.883333	0.791667		1.22221	1.09681
0	0.9		0.9	0.833333		1.24905	1.15026
0	0.883333		0.883333	0.916667		1.22221	1.27795
0	0.833333		0.833333	0.75		1.15026	1.0472
0	0.9		0.9	0.875		1.24905	1.20943
0	0.866667		0.866667	0.833333		1.197	1.15026
0	0.5		0.5	0.541667		0.785398	0.827113
0	0.933333		0.933333	0.708333		1.30964	1.00029
0	0.866667		0.866667	0.916667		1.197	1.27795
0	0.933333		0.933333	1		1.30964	1.5708
0	0.916667		0.916667	0.833333		1.27795	1.15026
0	0.683333		0.683333	0.75		0.97311	1.0472
0	0.766667		0.766667	0.75		1.06667	1.0472
0	0.833333		0.833333	0.875		1.15026	1.20943
0	0.9		0.9	0.958333		1.24905	1.36523
0	0.7		0.7	0.833333		0.991157	1.15026
0	0.766667		0.766667	0.75		1.06667	1.0472
0	0.8		0.8	0.791667		1.10715	1.09681
0	0.766667		0.766667	0.833333		1.06667	1.15026
0	0.95		0.95	0.875		1.34528	1.20943
0	0.833333		0.833333	0.666667		1.15026	0.955317
0	0.833333		0.833333	0.791667		1.15026	1.09681
0	0.4		0.4	0.291667		0.684719	0.57051
0	0.85		0.85	0.916667		1.1731	1.27795
0	0.883333		0.883333	0.791667		1.22221	1.09681
0	0.683333		0.683333	0.708333		0.97311	1.00029
0	0.95		0.95	0.875		1.34528	1.20943
0	0.8		0.8	0.875		1.10715	1.20943
0	0.733333		0.733333	0.791667		1.02816	1.09681
0	0.9		0.9	0.791667		1.24905	1.09681
0	0.816667		0.816667	0.75		1.12832	1.0472
0	0.583333		0.583333	0.833333		0.869122	1.15026
0	0.9		0.9	0.833333		1.24905	1.15026
0	0.85		0.85	0.708333		1.1731	1.00029
0	0.666667		0.666667	0.708333		0.955317	1.00029
0	0.766667		0.766667	0.916667		1.06667	1.27795
0	0.75		0.75	0.875		1.0472	1.20943
0	0.65		0.65	0.625		0.937744	0.911738
0	0.783333		0.783333	0.708333		1.08663	1.00029
0	0.833333		0.833333	0.875		1.15026	1.20943
0	0.833333		0.833333	0.833333		1.15026	1.15026
0	0.816667		0.816667	0.791667		1.12832	1.09681
0	0.65		0.65	0.625		0.937744	0.911738
0	0.95		0.95	0.875		1.34528	1.20943
0	0.733333		0.733333	0.833333		1.02816	1.15026
0	0.766667		0.766667	0.666667		1.06667	0.955317
0	0.883333		0.883333	0.791667		1.22221	1.09681
0	0.9		0.9	0.916667		1.24905	1.27795
0	0.833333		0.833333	0.708333		1.15026	1.00029
0	0.783333		0.783333	0.75		1.08663	1.0472
0	0.85		0.85	0.875		1.1731	1.20943
0	0.966667		0.966667	0.916667		1.38719	1.27795
0	0.9		0.9	0.916667		1.24905	1.27795
0	0.9		0.9	0.75		1.24905	1.0472
0	0.8		0.8	0.875		1.10715	1.20943
0	0.85		0.85	0.708333		1.1731	1.00029
0	0.783333		0.783333	0.791667		1.08663	1.09681
0	0.783333		0.783333	0.833333		1.08663	1.15026
0	0.833333		0.833333	0.791667		1.15026	1.09681
0	0.833333		0.833333	0.75		1.15026	1.0472
0	0.733333		0.733333	0.833333		1.02816	1.15026
0	0.9		0.9	0.875		1.24905	1.20943
0	0.9		0.9	0.791667		1.24905	1.09681
0	0.55		0.55	0.5		0.835482	0.785398
0	0.8		0.8	0.875		1.10715	1.20943
0	0.75		0.75	0.75		1.0472	1.0472
0	0.85		0.85	0.708333		1.1731	1.00029
0	0.6		0.6	0.583333		0.886077	0.869122
0	0.566667		0.566667	0.666667		0.852264	0.955317
0	0.8		0.8	0.833333		1.10715	1.15026
0	0.816667		0.816667	0.875		1.12832	1.20943
0	0.783333		0.783333	0.791667		1.08663	1.09681
0	0.816667		0.816667	0.708333		1.12832	1.00029
0	0.8		0.8	0.708333		1.10715	1.00029
0	0.683333		0.683333	0.75		0.97311	1.0472
0	0.783333		0.783333	0.75		1.08663	1.0472
0	0.816667		0.816667	0.791667		1.12832	1.09681
0	0.483333		0.483333	0.458333		0.768728	0.743683
0	0.85		0.85	0.625		1.1731	0.911738
0	0.85		0.85	0.833333		1.1731	1.15026
0	0.95		0.95	0.875		1.34528	1.20943
0	0.616667		0.616667	0.375		0.90315	0.659058
0	0.616667		0.616667	0.625		0.90315	0.911738
0	0.666667		0.666667	0.666667		0.955317	0.955317
0	0.533333		0.533333	0.5		0.818756	0.785398
0	0.75		0.75	0.75		1.0472	1.0472
0	0.7		0.7	0.666667		0.991157	0.955317
0	0.883333		0.883333	0.916667		1.22221	1.27795
0	0.816667		0.816667	0.791667		1.12832	1.09681
0	0.9		0.9	0.916667		1.24905	1.27795
0	0.783333		0.783333	0.708333		1.08663	1.00029
0	0.866667		0.866667	0.791667		1.197	1.09681
0	0.933333		0.933333	1		1.30964	1.5708
0	0.866667		0.866667	0.791667		1.197	1.09681
0	0.8		0.8	0.791667		1.10715	1.09681
0	0.816667		0.816667	0.916667		1.12832	1.27795
0	0.733333		0.733333	0.916667		1.02816	1.27795
0	0.9		0.9	0.791667		1.24905	1.09681
0	0.933333		0.933333	0.791667		1.30964	1.09681
0	0.75		0.75	0.666667		1.0472	0.955317
0	0.566667		0.566667	0.833333		0.852264	1.15026
0	0.75		0.75	0.916667		1.0472	1.27795
0	0.9		0.9	0.708333		1.24905	1.00029
0	0.883333		0.883333	0.916667		1.22221	1.27795
0	0.766667		0.766667	0.708333		1.06667	1.00029
0	0.816667		0.816667	0.833333		1.12832	1.15026
0	0.9		0.9	0.833333		1.24905	1.15026
0	0.766667		0.766667	0.791667		1.06667	1.09681
0	0.766667		0.766667	0.75		1.06667	1.0472
0	0.733333		0.733333	0.625		1.02816	0.911738
0	0.866667		0.866667	0.75		1.197	1.0472
0	0.95		0.95	0.791667		1.34528	1.09681
0	0.916667		0.916667	0.708333		1.27795	1.00029
0	0.816667		0.816667	0.833333		1.12832	1.15026
0	0.883333		0.883333	0.791667		1.22221	1.09681
0	0.866667		0.866667	0.75		1.197	1.0472
0	0.783333		0.783333	0.791667		1.08663	1.09681
0	0.8		0.8	0.708333		1.10715	1.00029
0	0.716667		0.716667	0.833333		1.00949	1.15026
0	0.916667		0.916667	0.75		1.27795	1.0472
0	0.85		0.85	0.875		1.1731	1.20943
0	0.766667		0.766667	0.958333		1.06667	1.36523
0	0.916667		0.916667	0.875		1.27795	1.20943
0	0.816667		0.816667	0.833333		1.12832	1.15026
0	0.916667		0.916667	0.833333		1.27795	1.15026
0	0.883333		0.883333	0.791667		1.22221	1.09681
0	0.95		0.95	0.916667		1.34528	1.27795
0	0.9		0.9	0.708333		1.24905	1.00029
0	0.533333		0.533333	0.541667		0.818756	0.827113
0	0.9		0.9	0.833333		1.24905	1.15026
0	0.7		0.7	0.791667		0.991157	1.09681
0	0.8		0.8	0.791667		1.10715	1.09681
0	0.916667		0.916667	0.875		1.27795	1.20943
0	0.833333		0.833333	0.791667		1.15026	1.09681
0	0.9		0.9	0.791667		1.24905	1.09681
0	0.933333		0.933333	0.791667		1.30964	1.09681
0	0.883333		0.883333	0.833333		1.22221	1.15026
0	0.766667		0.766667	0.875		1.06667	1.20943
0	0.766667		0.766667	0.666667		1.06667	0.955317
0	0.9		0.9	0.875		1.24905	1.20943
0	0.933333		0.933333	0.875		1.30964	1.20943
0	0.95		0.95	0.916667		1.34528	1.27795
0	0.833333		0.833333	0.833333		1.15026	1.15026
0	0.95		0.95	0.791667		1.34528	1.09681
0	0.883333		0.883333	0.916667		1.22221	1.27795
0	0.8		0.8	0.708333		1.10715	1.00029
0	0.85		0.85	0.875		1.1731	1.20943
0	0.9		0.9	0.916667		1.24905	1.27795
0	0.95		0.95	0.875		1.34528	1.20943
0	0.916667		0.916667	0.916667		1.27795	1.27795
0	0.85		0.85	0.916667		1.1731	1.27795
0	0.95		0.95	0.875		1.34528	1.20943
0	0.833333		0.833333	0.875		1.15026	1.20943
0	0.916667		0.916667	0.75		1.27795	1.0472
0	0.783333		0.783333	0.791667		1.08663	1.09681
0	0.866667		0.866667	0.75		1.197	1.0472
0	0.883333		0.883333	0.916667		1.22221	1.27795
0	0.916667		0.916667	0.791667		1.27795	1.09681
0	0.85		0.85	0.666667		1.1731	0.955317
1	0.791667
1	0.708333
1	0.375
1	0.791667
1	0.833333
1	0.791667
1	0.833333
1	0.666667
1	0.791667
1	0.916667
1	0.833333
1	0.708333
1	0.916667
1	0.791667
1	0.75
1	0.708333
1	0.916667
1	0.916667
1	0.791667
1	0.875
1	0.875
1	0.583333
1	0.875
1	0.916667
1	0.666667
1	0.75
1	0.75
1	0.458333
1	0.5
1	0.75
1	0.875
1	0.791667
1	0.625
1	0.666667
1	0.666667
1	0.75
1	0.75
1	0.75
1	0.958333
1	0.75
1	0.75
1	0.833333
1	0.916667
1	0.875
1	0.75
1	0.708333
1	0.75
1	0.708333
1	0.875
1	0.791667
1	0.833333
1	0.791667
1	0.916667
1	0.666667
1	0.708333
1	0.875
1	0.75
1	0.916667
1	0.916667
1	0.916667
1	0.75
1	0.791667
1	0.916667
1	0.833333
1	0.833333
1	0.833333
1	0.833333
1	0.875
1	0.791667
1	0.833333
1	0.916667
1	0.75
1	0.875
1	0.833333
1	0.541667
1	0.708333
1	0.916667
1	1
1	0.833333
1	0.75
1	0.75
1	0.875
1	0.958333
1	0.833333
1	0.75
1	0.791667
1	0.833333
1	0.875
1	0.666667
1	0.791667
1	0.291667
1	0.916667
1	0.791667
1	0.708333
1	0.875
1	0.875
1	0.791667
1	0.791667
1	0.75
1	0.833333
1	0.833333
1	0.708333
1	0.708333
1	0.916667
1	0.875
1	0.625
1	0.708333
1	0.875
1	0.833333
1	0.791667
1	0.625
1	0.875
1	0.833333
1	0.666667
1	0.791667
1	0.916667
1	0.708333
1	0.75
1	0.875
1	0.916667
1	0.916667
1	0.75
1	0.875
1	0.708333
1	0.791667
1	0.833333
1	0.791667
1	0.75
1	0.833333
1	0.875
1	0.791667
1	0.5
1	0.875
1	0.75
1	0.708333
1	0.583333
1	0.666667
1	0.833333
1	0.875
1	0.791667
1	0.708333
1	0.708333
1	0.75
1	0.75
1	0.791667
1	0.458333
1	0.625
1	0.833333
1	0.875
1	0.375
1	0.625
1	0.666667
1	0.5
1	0.75
1	0.666667
1	0.916667
1	0.791667
1	0.916667
1	0.708333
1	0.791667
1	1
1	0.791667
1	0.791667
1	0.916667
1	0.916667
1	0.791667
1	0.791667
1	0.666667
1	0.833333
1	0.916667
1	0.708333
1	0.916667
1	0.708333
1	0.833333
1	0.833333
1	0.791667
1	0.75
1	0.625
1	0.75
1	0.791667
1	0.708333
1	0.833333
1	0.791667
1	0.75
1	0.791667
1	0.708333
1	0.833333
1	0.75
1	0.875
1	0.958333
1	0.875
1	0.833333
1	0.833333
1	0.791667
1	0.916667
1	0.708333
1	0.541667
1	0.833333
1	0.791667
1	0.791667
1	0.875
1	0.791667
1	0.791667
1	0.791667
1	0.833333
1	0.875
1	0.666667
1	0.875
1	0.875
1	0.916667
1	0.833333
1	0.791667
1	0.916667
1	0.708333
1	0.875
1	0.916667
1	0.875
1	0.916667
1	0.916667
1	0.875
1	0.875
1	0.75
1	0.791667
1	0.75
1	0.916667
1	0.791667
1	0.666667

## Sheet: Pairing Type
Dataset	Accuracy		Match?	Mismatch?		Match?	Mismatch?
0	0.916667		0.916667	0.741667		1.27795	1.03763
0	0.908333		0.908333	0.416667		1.2632	0.701674
0	0.625		0.625	0.383333		0.911738	0.667646
0	0.925		0.925	0.783333		1.29339	1.08663
0	0.766667		0.766667	0.833333		1.06667	1.15026
0	0.9		0.9	0.708333		1.24905	1.00029
0	0.775		0.775	0.925		1.07658	1.29339
0	0.658333		0.658333	0.825		0.946505	1.13919
0	0.608333		0.608333	0.966667		0.894598	1.38719
0	0.875		0.875	0.908333		1.20943	1.2632
0	0.941667		0.941667	0.825		1.32686	1.13919
0	0.783333		0.783333	0.775		1.08663	1.07658
0	0.891667		0.891667	0.875		1.2354	1.20943
0	0.791667		0.791667	0.833333		1.09681	1.15026
0	0.516667		0.516667	0.866667		0.802068	1.197
0	0.675		0.675	0.9		0.964184	1.24905
0	0.925		0.925	0.908333		1.29339	1.2632
0	0.983333		0.983333	0.883333		1.44134	1.22221
0	0.9		0.9	0.825		1.24905	1.13919
0	0.925		0.925	0.8		1.29339	1.10715
0	0.816667		0.816667	0.925		1.12832	1.29339
0	0.75		0.75	0.6		1.0472	0.886077
0	0.883333		0.883333	0.925		1.22221	1.29339
0	0.85		0.85	0.966667		1.1731	1.38719
0	0.691667		0.691667	0.808333		0.982099	1.11765
0	0.641667		0.641667	0.908333		0.929032	1.2632
0	0.808333		0.808333	0.808333		1.11765	1.11765
0	0.216667		0.216667	0.775		0.484171	1.07658
0	0.466667		0.466667	0.766667		0.75204	1.06667
0	0.525		0.525	0.891667		0.810409	1.2354
0	0.8		0.8	0.875		1.10715	1.20943
0	0.733333		0.733333	0.908333		1.02816	1.2632
0	0.891667		0.891667	0.466667		1.2354	0.75204
0	0.625		0.625	0.841667		0.911738	1.16156
0	0.55		0.55	0.883333		0.835482	1.22221
0	0.633333		0.633333	0.933333		0.920365	1.30964
0	0.908333		0.908333	0.575		1.2632	0.860682
0	0.758333		0.758333	0.741667		1.05687	1.03763
0	0.916667		0.916667	0.791667		1.27795	1.09681
0	0.758333		0.758333	0.775		1.05687	1.07658
0	0.666667		0.666667	0.883333		0.955317	1.22221
0	0.858333		0.858333	0.691667		1.1849	0.982099
0	0.791667		0.791667	0.891667		1.09681	1.2354
0	0.741667		0.741667	0.966667		1.03763	1.38719
0	0.766667		0.766667	0.783333		1.06667	1.08663
0	0.9		0.9	0.675		1.24905	0.964184
0	0.625		0.625	0.825		0.911738	1.13919
0	0.9		0.9	0.708333		1.24905	1.00029
0	0.916667		0.916667	0.841667		1.27795	1.16156
0	0.791667		0.791667	0.783333		1.09681	1.08663
0	0.875		0.875	0.791667		1.20943	1.09681
0	0.816667		0.816667	0.925		1.12832	1.29339
0	0.875		0.875	0.741667		1.20943	1.03763
0	0.625		0.625	0.841667		0.911738	1.16156
0	0.666667		0.666667	0.708333		0.955317	1.00029
0	0.925		0.925	0.833333		1.29339	1.15026
0	0.8		0.8	0.716667		1.10715	1.00949
0	0.9		0.9	0.966667		1.24905	1.38719
0	0.958333		0.958333	0.891667		1.36523	1.2354
0	0.966667		0.966667	0.833333		1.38719	1.15026
0	0.925		0.925	0.625		1.29339	0.911738
0	0.775		0.775	0.9		1.07658	1.24905
0	0.983333		0.983333	0.883333		1.44134	1.22221
0	0.883333		0.883333	0.733333		1.22221	1.02816
0	0.783333		0.783333	0.783333		1.08663	1.08663
0	0.916667		0.916667	0.866667		1.27795	1.197
0	0.691667		0.691667	0.891667		0.982099	1.2354
0	0.841667		0.841667	0.95		1.16156	1.34528
0	0.891667		0.891667	0.783333		1.2354	1.08663
0	0.808333		0.808333	0.925		1.11765	1.29339
0	0.833333		0.833333	0.966667		1.15026	1.38719
0	0.65		0.65	0.933333		0.937744	1.30964
0	0.941667		0.941667	0.833333		1.32686	1.15026
0	0.85		0.85	0.85		1.1731	1.1731
0	0.716667		0.716667	0.325		1.00949	0.606613
0	0.8		0.8	0.841667		1.10715	1.16156
0	0.933333		0.933333	0.85		1.30964	1.1731
0	0.966667		0.966667	0.966667		1.38719	1.38719
0	0.791667		0.791667	0.958333		1.09681	1.36523
0	0.5		0.5	0.933333		0.785398	1.30964
0	0.875		0.875	0.641667		1.20943	0.929032
0	0.8		0.8	0.908333		1.10715	1.2632
0	0.925		0.925	0.933333		1.29339	1.30964
0	0.75		0.75	0.783333		1.0472	1.08663
0	0.875		0.875	0.641667		1.20943	0.929032
0	0.783333		0.783333	0.808333		1.08663	1.11765
0	0.891667		0.891667	0.708333		1.2354	1.00029
0	0.866667		0.866667	0.958333		1.197	1.36523
0	0.7		0.7	0.8		0.991157	1.10715
0	0.658333		0.658333	0.966667		0.946505	1.38719
0	0.408333		0.408333	0.283333		0.69321	0.561304
0	0.908333		0.908333	0.858333		1.2632	1.1849
0	0.941667		0.941667	0.733333		1.32686	1.02816
0	0.791667		0.791667	0.6		1.09681	0.886077
0	0.858333		0.858333	0.966667		1.1849	1.38719
0	0.808333		0.808333	0.866667		1.11765	1.197
0	0.966667		0.966667	0.558333		1.38719	0.843865
0	0.808333		0.808333	0.883333		1.11765	1.22221
0	0.816667		0.816667	0.75		1.12832	1.0472
0	0.633333		0.633333	0.783333		0.920365	1.08663
0	0.941667		0.941667	0.791667		1.32686	1.09681
0	0.825		0.825	0.733333		1.13919	1.02816
0	0.483333		0.483333	0.891667		0.768728	1.2354
0	0.716667		0.716667	0.966667		1.00949	1.38719
0	0.716667		0.716667	0.908333		1.00949	1.2632
0	0.541667		0.541667	0.733333		0.827113	1.02816
0	0.775		0.775	0.716667		1.07658	1.00949
0	0.833333		0.833333	0.875		1.15026	1.20943
0	0.925		0.925	0.741667		1.29339	1.03763
0	0.608333		0.608333	1		0.894598	1.5708
0	0.85		0.85	0.425		1.1731	0.710114
0	0.9		0.9	0.925		1.24905	1.29339
0	0.75		0.75	0.816667		1.0472	1.12832
0	0.558333		0.558333	0.875		0.843865	1.20943
0	0.833333		0.833333	0.841667		1.15026	1.16156
0	0.908333		0.908333	0.908333		1.2632	1.2632
0	0.891667		0.891667	0.65		1.2354	0.937744
0	0.866667		0.866667	0.666667		1.197	0.955317
0	0.966667		0.966667	0.758333		1.38719	1.05687
0	0.916667		0.916667	0.966667		1.27795	1.38719
0	0.866667		0.866667	0.95		1.197	1.34528
0	0.683333		0.683333	0.966667		0.97311	1.38719
0	0.983333		0.983333	0.691667		1.44134	0.982099
0	0.691667		0.691667	0.866667		0.982099	1.197
0	0.608333		0.608333	0.966667		0.894598	1.38719
0	0.791667		0.791667	0.825		1.09681	1.13919
0	0.866667		0.866667	0.758333		1.197	1.05687
0	0.758333		0.758333	0.825		1.05687	1.13919
0	0.908333		0.908333	0.658333		1.2632	0.946505
0	0.916667		0.916667	0.858333		1.27795	1.1849
0	0.941667		0.941667	0.75		1.32686	1.0472
0	0.491667		0.491667	0.558333		0.777064	0.843865
0	0.85		0.85	0.825		1.1731	1.13919
0	0.8		0.8	0.7		1.10715	0.991157
0	0.8		0.8	0.758333		1.10715	1.05687
0	0.491667		0.491667	0.691667		0.777064	0.982099
0	0.391667		0.391667	0.841667		0.676199	1.16156
0	0.883333		0.883333	0.75		1.22221	1.0472
0	0.783333		0.783333	0.908333		1.08663	1.2632
0	0.833333		0.833333	0.741667		1.15026	1.03763
0	0.683333		0.683333	0.841667		0.97311	1.16156
0	0.875		0.875	0.633333		1.20943	0.920365
0	0.516667		0.516667	0.916667		0.802068	1.27795
0	0.816667		0.816667	0.716667		1.12832	1.00949
0	0.683333		0.683333	0.925		0.97311	1.29339
0	0.391667		0.391667	0.55		0.676199	0.835482
0	0.625		0.625	0.85		0.911738	1.1731
0	0.791667		0.791667	0.891667		1.09681	1.2354
0	0.858333		0.858333	0.966667		1.1849	1.38719
0	0.166667		0.166667	0.825		0.420534	1.13919
0	0.433333		0.433333	0.808333		0.718532	1.11765
0	0.708333		0.708333	0.625		1.00029	0.911738
0	0.075		0.075	0.958333		0.277406	1.36523
0	0.625		0.625	0.875		0.911738	1.20943
0	0.516667		0.516667	0.85		0.802068	1.1731
0	0.908333		0.908333	0.891667		1.2632	1.2354
0	0.758333		0.758333	0.85		1.05687	1.1731
0	0.958333		0.958333	0.858333		1.36523	1.1849
0	0.716667		0.716667	0.775		1.00949	1.07658
0	0.733333		0.733333	0.925		1.02816	1.29339
0	1		1	0.933333		1.5708	1.30964
0	0.883333		0.883333	0.775		1.22221	1.07658
0	0.891667		0.891667	0.7		1.2354	0.991157
0	0.816667		0.816667	0.916667		1.12832	1.27795
0	0.7		0.7	0.95		0.991157	1.34528
0	0.9		0.9	0.791667		1.24905	1.09681
0	0.841667		0.841667	0.883333		1.16156	1.22221
0	0.633333		0.633333	0.783333		0.920365	1.08663
0	0.633333		0.633333	0.766667		0.920365	1.06667
0	0.8		0.8	0.866667		1.10715	1.197
0	0.783333		0.783333	0.825		1.08663	1.13919
0	0.925		0.925	0.875		1.29339	1.20943
0	0.866667		0.866667	0.608333		1.197	0.894598
0	0.8		0.8	0.85		1.10715	1.1731
0	0.866667		0.866667	0.866667		1.197	1.197
0	0.816667		0.816667	0.741667		1.12832	1.03763
0	0.808333		0.808333	0.708333		1.11765	1.00029
0	0.983333		0.983333	0.375		1.44134	0.659058
0	0.741667		0.741667	0.875		1.03763	1.20943
0	0.816667		0.816667	0.925		1.12832	1.29339
0	0.9		0.9	0.725		1.24905	1.01878
0	0.716667		0.716667	0.933333		1.00949	1.30964
0	0.816667		0.816667	0.858333		1.12832	1.1849
0	0.833333		0.833333	0.783333		1.15026	1.08663
0	0.775		0.775	0.8		1.07658	1.10715
0	0.708333		0.708333	0.8		1.00029	1.10715
0	0.6		0.6	0.95		0.886077	1.34528
0	0.783333		0.783333	0.883333		1.08663	1.22221
0	0.816667		0.816667	0.908333		1.12832	1.2632
0	0.916667		0.916667	0.808333		1.27795	1.11765
0	0.791667		0.791667	1		1.09681	1.5708
0	0.966667		0.966667	0.683333		1.38719	0.97311
0	0.866667		0.866667	0.883333		1.197	1.22221
0	0.75		0.75	0.925		1.0472	1.29339
0	0.941667		0.941667	0.925		1.32686	1.29339
0	1		1	0.608333		1.5708	0.894598
0	0.358333		0.358333	0.716667		0.641764	1.00949
0	0.841667		0.841667	0.891667		1.16156	1.2354
0	0.875		0.875	0.616667		1.20943	0.90315
0	0.658333		0.658333	0.933333		0.946505	1.30964
0	0.916667		0.916667	0.875		1.27795	1.20943
0	0.733333		0.733333	0.891667		1.02816	1.2354
0	0.783333		0.783333	0.908333		1.08663	1.2632
0	0.841667		0.841667	0.883333		1.16156	1.22221
0	0.908333		0.908333	0.808333		1.2632	1.11765
0	0.8		0.8	0.841667		1.10715	1.16156
0	0.55		0.55	0.883333		0.835482	1.22221
0	0.925		0.925	0.85		1.29339	1.1731
0	1		1	0.808333		1.5708	1.11765
0	0.983333		0.983333	0.883333		1.44134	1.22221
0	0.891667		0.891667	0.775		1.2354	1.07658
0	0.875		0.875	0.866667		1.20943	1.197
0	0.908333		0.908333	0.891667		1.2632	1.2354
0	0.866667		0.866667	0.641667		1.197	0.929032
0	0.925		0.925	0.8		1.29339	1.10715
0	0.941667		0.941667	0.875		1.32686	1.20943
0	0.858333		0.858333	0.966667		1.1849	1.38719
0	0.908333		0.908333	0.925		1.2632	1.29339
0	0.825		0.825	0.941667		1.13919	1.32686
0	0.858333		0.858333	0.966667		1.1849	1.38719
0	0.85		0.85	0.858333		1.1731	1.1849
0	0.9		0.9	0.766667		1.24905	1.06667
0	0.75		0.75	0.825		1.0472	1.13919
0	0.633333		0.633333	0.983333		0.920365	1.44134
0	0.875		0.875	0.925		1.20943	1.29339
0	0.941667		0.941667	0.766667		1.32686	1.06667
0	0.825		0.825	0.691667		1.13919	0.982099
1	0.741667
1	0.416667
1	0.383333
1	0.783333
1	0.833333
1	0.708333
1	0.925
1	0.825
1	0.966667
1	0.908333
1	0.825
1	0.775
1	0.875
1	0.833333
1	0.866667
1	0.9
1	0.908333
1	0.883333
1	0.825
1	0.8
1	0.925
1	0.6
1	0.925
1	0.966667
1	0.808333
1	0.908333
1	0.808333
1	0.775
1	0.766667
1	0.891667
1	0.875
1	0.908333
1	0.466667
1	0.841667
1	0.883333
1	0.933333
1	0.575
1	0.741667
1	0.791667
1	0.775
1	0.883333
1	0.691667
1	0.891667
1	0.966667
1	0.783333
1	0.675
1	0.825
1	0.708333
1	0.841667
1	0.783333
1	0.791667
1	0.925
1	0.741667
1	0.841667
1	0.708333
1	0.833333
1	0.716667
1	0.966667
1	0.891667
1	0.833333
1	0.625
1	0.9
1	0.883333
1	0.733333
1	0.783333
1	0.866667
1	0.891667
1	0.95
1	0.783333
1	0.925
1	0.966667
1	0.933333
1	0.833333
1	0.85
1	0.325
1	0.841667
1	0.85
1	0.966667
1	0.958333
1	0.933333
1	0.641667
1	0.908333
1	0.933333
1	0.783333
1	0.641667
1	0.808333
1	0.708333
1	0.958333
1	0.8
1	0.966667
1	0.283333
1	0.858333
1	0.733333
1	0.6
1	0.966667
1	0.866667
1	0.558333
1	0.883333
1	0.75
1	0.783333
1	0.791667
1	0.733333
1	0.891667
1	0.966667
1	0.908333
1	0.733333
1	0.716667
1	0.875
1	0.741667
1	1
1	0.425
1	0.925
1	0.816667
1	0.875
1	0.841667
1	0.908333
1	0.65
1	0.666667
1	0.758333
1	0.966667
1	0.95
1	0.966667
1	0.691667
1	0.866667
1	0.966667
1	0.825
1	0.758333
1	0.825
1	0.658333
1	0.858333
1	0.75
1	0.558333
1	0.825
1	0.7
1	0.758333
1	0.691667
1	0.841667
1	0.75
1	0.908333
1	0.741667
1	0.841667
1	0.633333
1	0.916667
1	0.716667
1	0.925
1	0.55
1	0.85
1	0.891667
1	0.966667
1	0.825
1	0.808333
1	0.625
1	0.958333
1	0.875
1	0.85
1	0.891667
1	0.85
1	0.858333
1	0.775
1	0.925
1	0.933333
1	0.775
1	0.7
1	0.916667
1	0.95
1	0.791667
1	0.883333
1	0.783333
1	0.766667
1	0.866667
1	0.825
1	0.875
1	0.608333
1	0.85
1	0.866667
1	0.741667
1	0.708333
1	0.375
1	0.875
1	0.925
1	0.725
1	0.933333
1	0.858333
1	0.783333
1	0.8
1	0.8
1	0.95
1	0.883333
1	0.908333
1	0.808333
1	1
1	0.683333
1	0.883333
1	0.925
1	0.925
1	0.608333
1	0.716667
1	0.891667
1	0.616667
1	0.933333
1	0.875
1	0.891667
1	0.908333
1	0.883333
1	0.808333
1	0.841667
1	0.883333
1	0.85
1	0.808333
1	0.883333
1	0.775
1	0.866667
1	0.891667
1	0.641667
1	0.8
1	0.875
1	0.966667
1	0.925
1	0.941667
1	0.966667
1	0.858333
1	0.766667
1	0.825
1	0.983333
1	0.925
1	0.766667
1	0.691667

## Sheet: Experts Nonexperts
0Non 1Exp	%	Arc
0	0.829167	1.1447
0	0.6625	0.950904
0	0.504167	0.789565
0	0.854167	1.17897
0	0.8	1.10715
0	0.804167	1.11238
0	0.85	1.1731
0	0.741667	1.03763
0	0.7875	1.0917
0	0.891667	1.2354
0	0.883333	1.22221
0	0.779167	1.08159
0	0.883333	1.22221
0	0.8125	1.12296
0	0.691667	0.982099
0	0.7875	1.0917
0	0.916667	1.27795
0	0.933333	1.30964
0	0.8625	1.19092
0	0.8625	1.19092
0	0.870833	1.20317
0	0.675	0.964184
0	0.904167	1.25606
0	0.908333	1.2632
0	0.75	1.0472
0	0.775	1.07658
0	0.808333	1.11765
0	0.495833	0.781231
0	0.616667	0.90315
0	0.708333	1.00029
0	0.8375	1.15588
0	0.820833	1.13373
0	0.679167	0.968639
0	0.733333	1.02816
0	0.716667	1.00949
0	0.783333	1.08663
0	0.741667	1.03763
0	0.75	1.0472
0	0.854167	1.17897
0	0.766667	1.06667
0	0.775	1.07658
0	0.775	1.07658
0	0.841667	1.16156
0	0.854167	1.17897
0	0.775	1.07658
0	0.7875	1.0917
0	0.725	1.01878
0	0.804167	1.11238
0	0.879167	1.21577
0	0.7875	1.0917
0	0.833333	1.15026
0	0.870833	1.20317
0	0.808333	1.11765
0	0.733333	1.02816
0	0.6875	0.977597
0	0.879167	1.21577
0	0.758333	1.05687
0	0.933333	1.30964
0	0.925	1.29339
0	0.9	1.24905
0	0.775	1.07658
0	0.8375	1.15588
0	0.933333	1.30964
0	0.808333	1.11765
0	0.783333	1.08663
0	0.891667	1.2354
0	0.791667	1.09681
0	0.895833	1.24216
0	0.8375	1.15588
0	0.866667	1.197
0	0.9	1.24905
0	0.791667	1.09681
0	0.8875	1.22876
0	0.85	1.1731
0	0.520833	0.806238
0	0.820833	1.13373
0	0.891667	1.2354
0	0.966667	1.38719
0	0.875	1.20943
0	0.716667	1.00949
0	0.758333	1.05687
0	0.854167	1.17897
0	0.929167	1.3014
0	0.766667	1.06667
0	0.758333	1.05687
0	0.795833	1.10196
0	0.8	1.10715
0	0.9125	1.2705
0	0.75	1.0472
0	0.8125	1.12296
0	0.345833	0.628678
0	0.883333	1.22221
0	0.8375	1.15588
0	0.695833	0.986619
0	0.9125	1.2705
0	0.8375	1.15588
0	0.7625	1.06176
0	0.845833	1.1673
0	0.783333	1.08663
0	0.708333	1.00029
0	0.866667	1.197
0	0.779167	1.08159
0	0.6875	0.977597
0	0.841667	1.16156
0	0.8125	1.12296
0	0.6375	0.924693
0	0.745833	1.0424
0	0.854167	1.17897
0	0.833333	1.15026
0	0.804167	1.11238
0	0.6375	0.924693
0	0.9125	1.2705
0	0.783333	1.08663
0	0.716667	1.00949
0	0.8375	1.15588
0	0.908333	1.2632
0	0.770833	1.07161
0	0.766667	1.06667
0	0.8625	1.19092
0	0.941667	1.32686
0	0.908333	1.2632
0	0.825	1.13919
0	0.8375	1.15588
0	0.779167	1.08159
0	0.7875	1.0917
0	0.808333	1.11765
0	0.8125	1.12296
0	0.791667	1.09681
0	0.783333	1.08663
0	0.8875	1.22876
0	0.845833	1.1673
0	0.525	0.810409
0	0.8375	1.15588
0	0.75	1.0472
0	0.779167	1.08159
0	0.591667	0.877586
0	0.616667	0.90315
0	0.816667	1.12832
0	0.845833	1.1673
0	0.7875	1.0917
0	0.7625	1.06176
0	0.754167	1.05202
0	0.716667	1.00949
0	0.766667	1.06667
0	0.804167	1.11238
0	0.470833	0.756215
0	0.7375	1.03288
0	0.841667	1.16156
0	0.9125	1.2705
0	0.495833	0.781231
0	0.620833	0.90744
0	0.666667	0.955317
0	0.516667	0.802068
0	0.75	1.0472
0	0.683333	0.97311
0	0.9	1.24905
0	0.804167	1.11238
0	0.908333	1.2632
0	0.745833	1.0424
0	0.829167	1.1447
0	0.966667	1.38719
0	0.829167	1.1447
0	0.795833	1.10196
0	0.866667	1.197
0	0.825	1.13919
0	0.845833	1.1673
0	0.8625	1.19092
0	0.708333	1.00029
0	0.7	0.991157
0	0.833333	1.15026
0	0.804167	1.11238
0	0.9	1.24905
0	0.7375	1.03288
0	0.825	1.13919
0	0.866667	1.197
0	0.779167	1.08159
0	0.758333	1.05687
0	0.679167	0.968639
0	0.808333	1.11765
0	0.870833	1.20317
0	0.8125	1.12296
0	0.825	1.13919
0	0.8375	1.15588
0	0.808333	1.11765
0	0.7875	1.0917
0	0.754167	1.05202
0	0.775	1.07658
0	0.833333	1.15026
0	0.8625	1.19092
0	0.8625	1.19092
0	0.895833	1.24216
0	0.825	1.13919
1	0.875	1.20943
1	0.8375	1.15588
1	0.933333	1.30964
1	0.804167	1.11238
1	0.5375	0.822933
1	0.866667	1.197
1	0.745833	1.0424
1	0.795833	1.10196
1	0.895833	1.24216
1	0.8125	1.12296
1	0.845833	1.1673
1	0.8625	1.19092
1	0.858333	1.1849
1	0.820833	1.13373
1	0.716667	1.00949
1	0.8875	1.22876
1	0.904167	1.25606
1	0.933333	1.30964
1	0.833333	1.15026
1	0.870833	1.20317
1	0.9	1.24905
1	0.754167	1.05202
1	0.8625	1.19092
1	0.908333	1.2632
1	0.9125	1.2705
1	0.916667	1.27795
1	0.883333	1.22221
1	0.9125	1.2705
1	0.854167	1.17897
1	0.833333	1.15026
1	0.7875	1.0917
1	0.808333	1.11765
1	0.9	1.24905
1	0.854167	1.17897
1	0.758333	1.05687

## Sheet: Expertise vs. ITT
1Non 2Expert	1S 2N 3F	mean % accuracy		Expertise	ITT1	ITT2	ITT3		Expertise	ITT1	ITT2	ITT3
1	1	0.875		1	0.875	0.6375	0.975		1	1.20943	0.924693	1.41202
1	1	0.6625		1	0.6625	0.5875	0.7375		1	0.950904	0.873351	1.03288
1	1	0.6		1	0.6	0.55	0.3625		1	0.886077	0.835482	0.646103
1	1	0.7875		1	0.7875	0.775	1		1	1.0917	1.07658	1.5708
1	1	0.9		1	0.9	0.7	0.8		1	1.24905	0.991157	1.10715
1	1	0.9125		1	0.9125	0.7	0.8		1	1.2705	0.991157	1.10715
1	1	0.9125		1	0.9125	0.7125	0.925		1	1.2705	1.00488	1.29339
1	1	0.65		1	0.65	0.7125	0.8625		1	0.937744	1.00488	1.19092
1	1	0.8625		1	0.8625	0.6	0.9		1	1.19092	0.886077	1.24905
1	1	0.95		1	0.95	0.8125	0.9125		1	1.34528	1.12296	1.2705
1	1	0.85		1	0.85	0.8625	0.9375		1	1.1731	1.19092	1.31812
1	1	0.8875		1	0.8875	0.65	0.8		1	1.22876	0.937744	1.10715
1	1	0.95		1	0.95	0.7875	0.9125		1	1.34528	1.0917	1.2705
1	1	0.85		1	0.85	0.7625	0.825		1	1.1731	1.06176	1.13919
1	1	0.675		1	0.675	0.675	0.725		1	0.964184	0.964184	1.01878
1	1	0.825		1	0.825	0.7125	0.825		1	1.13919	1.00488	1.13919
1	1	0.9125		1	0.9125	0.8875	0.95		1	1.2705	1.22876	1.34528
1	1	0.9375		1	0.9375	0.8875	0.975		1	1.31812	1.22876	1.41202
1	1	0.9375		1	0.9375	0.65	1		1	1.31812	0.937744	1.5708
1	1	0.975		1	0.975	0.7875	0.825		1	1.41202	1.0917	1.13919
1	1	0.975		1	0.975	0.775	0.8625		1	1.41202	1.07658	1.19092
1	1	0.5875		1	0.5875	0.525	0.9125		1	0.873351	0.810409	1.2705
1	1	0.975		1	0.975	0.7875	0.95		1	1.41202	1.0917	1.34528
1	1	0.975		1	0.975	0.8875	0.8625		1	1.41202	1.22876	1.19092
1	1	0.7625		1	0.7625	0.725	0.7625		1	1.06176	1.01878	1.06176
1	1	0.825		1	0.825	0.6875	0.8125		1	1.13919	0.977597	1.12296
1	1	0.95		1	0.95	0.65	0.825		1	1.34528	0.937744	1.13919
1	1	0.425		1	0.425	0.5875	0.475		1	0.710114	0.873351	0.760388
1	1	0.5		1	0.5	0.575	0.775		1	0.785398	0.860682	1.07658
1	1	0.8125		1	0.8125	0.5875	0.725		1	1.12296	0.873351	1.01878
1	1	0.8625		1	0.8625	0.7625	0.8875		1	1.19092	1.06176	1.22876
1	1	0.9125		1	0.9125	0.725	0.825		1	1.2705	1.01878	1.13919
1	1	0.7375		1	0.7375	0.6875	0.6125		1	1.03288	0.977597	0.89887
1	1	0.775		1	0.775	0.6875	0.7375		1	1.07658	0.977597	1.03288
1	1	0.8375		1	0.8375	0.6	0.7125		1	1.15588	0.886077	1.00488
1	1	0.725		1	0.725	0.8	0.825		1	1.01878	1.10715	1.13919
1	1	0.8875		1	0.8875	0.55	0.7875		1	1.22876	0.835482	1.0917
1	1	0.8125		1	0.8125	0.675	0.7625		1	1.12296	0.964184	1.06176
1	1	0.875		1	0.875	0.8125	0.875		1	1.20943	1.12296	1.20943
1	1	0.8125		1	0.8125	0.5625	0.925		1	1.12296	0.848062	1.29339
1	1	0.7375		1	0.7375	0.725	0.8625		1	1.03288	1.01878	1.19092
1	1	0.8875		1	0.8875	0.65	0.7875		1	1.22876	0.937744	1.0917
1	1	0.95		1	0.95	0.7625	0.8125		1	1.34528	1.06176	1.12296
1	1	0.925		1	0.925	0.6625	0.975		1	1.29339	0.950904	1.41202
1	1	0.8		1	0.8	0.6875	0.8375		1	1.10715	0.977597	1.15588
1	1	0.875		1	0.875	0.55	0.9375		1	1.20943	0.835482	1.31812
1	1	0.675		1	0.675	0.725	0.775		1	0.964184	1.01878	1.07658
1	1	0.7875		1	0.7875	0.775	0.85		1	1.0917	1.07658	1.1731
1	1	0.925		1	0.925	0.775	0.9375		1	1.29339	1.07658	1.31812
1	1	0.8		1	0.8	0.7625	0.8		1	1.10715	1.06176	1.10715
1	1	0.8875		1	0.8875	0.75	0.8625		1	1.22876	1.0472	1.19092
1	1	0.9375		1	0.9375	0.7625	0.9125		1	1.31812	1.06176	1.2705
1	1	0.75		1	0.75	0.825	0.85		1	1.0472	1.13919	1.1731
1	1	0.775		1	0.775	0.6625	0.7625		1	1.07658	0.950904	1.06176
1	1	0.5		1	0.5	0.75	0.8125		1	0.785398	1.0472	1.12296
1	1	0.85		1	0.85	0.8375	0.95		1	1.1731	1.15588	1.34528
1	1	0.7125		1	0.7125	0.7875	0.775		1	1.00488	1.0917	1.07658
1	1	0.975		1	0.975	0.825	1		1	1.41202	1.13919	1.5708
1	1	0.9125		1	0.9125	0.8625	1		1	1.2705	1.19092	1.5708
1	1	0.95		1	0.95	0.8375	0.9125		1	1.34528	1.15588	1.2705
1	1	0.875		1	0.875	0.725	0.725		1	1.20943	1.01878	1.01878
1	1	0.925		1	0.925	0.675	0.9125		1	1.29339	0.964184	1.2705
1	1	1		1	1	0.825	0.975		1	1.5708	1.13919	1.41202
1	1	0.8		1	0.8	0.8125	0.8125		1	1.10715	1.12296	1.12296
1	1	0.8375		1	0.8375	0.675	0.8375		1	1.15588	0.964184	1.15588
1	1	0.9375		1	0.9375	0.7375	1		1	1.31812	1.03288	1.5708
1	1	0.7125		1	0.7125	0.7375	0.925		1	1.00488	1.03288	1.29339
1	1	0.9125		1	0.9125	0.8625	0.9125		1	1.2705	1.19092	1.2705
1	1	0.8875		1	0.8875	0.9125	0.7125		1	1.22876	1.2705	1.00488
1	1	0.95		1	0.95	0.675	0.975		1	1.34528	0.964184	1.41202
1	1	1		1	1	0.7625	0.9375		1	1.5708	1.06176	1.31812
1	1	0.825		1	0.825	0.7875	0.7625		1	1.13919	1.0917	1.06176
1	1	0.9125		1	0.9125	0.8875	0.8625		1	1.2705	1.22876	1.19092
1	1	0.8625		1	0.8625	0.8375	0.85		1	1.19092	1.15588	1.1731
1	1	0.375		1	0.375	0.675	0.5125		1	0.659058	0.964184	0.797899
1	1	0.85		1	0.85	0.7375	0.875		1	1.1731	1.03288	1.20943
1	1	0.9125		1	0.9125	0.7875	0.975		1	1.2705	1.0917	1.41202
1	1	0.975		1	0.975	0.95	0.975		1	1.41202	1.34528	1.41202
1	1	0.85		1	0.85	0.8	0.975		1	1.1731	1.10715	1.41202
1	1	0.6625		1	0.6625	0.7625	0.725		1	0.950904	1.06176	1.01878
1	1	0.8125		1	0.8125	0.725	0.7375		1	1.12296	1.01878	1.03288
1	1	0.8375		1	0.8375	0.825	0.9		1	1.15588	1.13919	1.24905
1	1	0.9		1	0.9	0.95	0.9375		1	1.24905	1.34528	1.31812
1	1	0.725		1	0.725	0.8	0.775		1	1.01878	1.10715	1.07658
1	1	0.85		1	0.85	0.7125	0.7125		1	1.1731	1.00488	1.00488
1	1	0.7375		1	0.7375	0.7375	0.9125		1	1.03288	1.03288	1.2705
1	1	0.8375		1	0.8375	0.675	0.8875		1	1.15588	0.964184	1.22876
1	1	0.9125		1	0.9125	0.85	0.975		1	1.2705	1.1731	1.41202
1	1	0.8		1	0.8	0.6	0.85		1	1.10715	0.886077	1.1731
1	1	0.8		1	0.8	0.6875	0.95		1	1.10715	0.977597	1.34528
1	1	0.4375		1	0.4375	0.225	0.375		1	0.722734	0.494216	0.659058
1	1	0.8125		1	0.8125	0.9	0.9375		1	1.12296	1.24905	1.31812
1	1	0.875		1	0.875	0.725	0.9125		1	1.20943	1.01878	1.2705
1	1	0.65		1	0.65	0.625	0.8125		1	0.937744	0.911738	1.12296
1	1	0.9375		1	0.9375	0.825	0.975		1	1.31812	1.13919	1.41202
1	1	0.8125		1	0.8125	0.725	0.975		1	1.12296	1.01878	1.41202
1	1	0.8375		1	0.8375	0.675	0.775		1	1.15588	0.964184	1.07658
1	1	0.8		1	0.8	0.8	0.9375		1	1.10715	1.10715	1.31812
1	1	0.7875		1	0.7875	0.8	0.7625		1	1.0917	1.10715	1.06176
1	1	0.8		1	0.8	0.6875	0.6375		1	1.10715	0.977597	0.924693
1	1	0.875		1	0.875	0.8125	0.9125		1	1.20943	1.12296	1.2705
1	1	0.85		1	0.85	0.6	0.8875		1	1.1731	0.886077	1.22876
1	1	0.8		1	0.8	0.6625	0.6		1	1.10715	0.950904	0.886077
1	1	0.7625		1	0.7625	0.875	0.8875		1	1.06176	1.20943	1.22876
1	1	0.9		1	0.9	0.7125	0.825		1	1.24905	1.00488	1.13919
1	1	0.5875		1	0.5875	0.525	0.8		1	0.873351	0.810409	1.10715
1	1	0.8625		1	0.8625	0.6375	0.7375		1	1.19092	0.924693	1.03288
1	1	0.9375		1	0.9375	0.725	0.9		1	1.31812	1.01878	1.24905
1	1	0.975		1	0.975	0.6625	0.8625		1	1.41202	0.950904	1.19092
1	1	0.8		1	0.8	0.6375	0.975		1	1.10715	0.924693	1.41202
1	1	0.7125		1	0.7125	0.6625	0.5375		1	1.00488	0.950904	0.822933
1	1	0.9375		1	0.9375	0.825	0.975		1	1.31812	1.13919	1.41202
1	1	0.6625		1	0.6625	0.7625	0.925		1	0.950904	1.06176	1.29339
1	1	0.65		1	0.65	0.725	0.775		1	0.937744	1.01878	1.07658
1	1	0.825		1	0.825	0.775	0.9125		1	1.13919	1.07658	1.2705
1	1	0.9375		1	0.9375	0.8125	0.975		1	1.31812	1.12296	1.41202
1	1	0.9375		1	0.9375	0.55	0.825		1	1.31812	0.835482	1.13919
1	1	0.6625		1	0.6625	0.8375	0.8		1	0.950904	1.15588	1.10715
1	1	0.95		1	0.95	0.7875	0.85		1	1.34528	1.0917	1.1731
1	1	1		1	1	0.825	1		1	1.5708	1.13919	1.5708
1	1	0.8625		1	0.8625	0.8875	0.975		1	1.19092	1.22876	1.41202
1	1	0.7625		1	0.7625	0.7375	0.975		1	1.06176	1.03288	1.41202
1	1	0.9125		1	0.9125	0.85	0.75		1	1.2705	1.1731	1.0472
1	1	0.7875		1	0.7875	0.7	0.85		1	1.0917	0.991157	1.1731
1	1	0.75		1	0.75	0.725	0.8875		1	1.0472	1.01878	1.22876
1	1	0.8375		1	0.8375	0.75	0.8375		1	1.15588	1.0472	1.15588
1	1	0.7625		1	0.7625	0.8125	0.8625		1	1.06176	1.12296	1.19092
1	1	0.8		1	0.8	0.7125	0.8625		1	1.10715	1.00488	1.19092
1	1	0.8625		1	0.8625	0.6125	0.875		1	1.19092	0.89887	1.20943
1	1	1		1	1	0.6875	0.975		1	1.5708	0.977597	1.41202
1	1	0.825		1	0.825	0.8625	0.85		1	1.13919	1.19092	1.1731
1	1	0.625		1	0.625	0.35	0.6		1	0.911738	0.633052	0.886077
1	1	0.75		1	0.75	0.8375	0.925		1	1.0472	1.15588	1.29339
1	1	0.6875		1	0.6875	0.7625	0.8		1	0.977597	1.06176	1.10715
1	1	0.85		1	0.85	0.6875	0.8		1	1.1731	0.977597	1.10715
1	1	0.6125		1	0.6125	0.4625	0.7		1	0.89887	0.747863	0.991157
1	1	0.75		1	0.75	0.575	0.525		1	1.0472	0.860682	0.810409
1	1	0.8375		1	0.8375	0.75	0.8625		1	1.15588	1.0472	1.19092
1	1	0.9375		1	0.9375	0.65	0.95		1	1.31812	0.937744	1.34528
1	1	0.775		1	0.775	0.85	0.7375		1	1.07658	1.1731	1.03288
1	1	0.8		1	0.8	0.7	0.7875		1	1.10715	0.991157	1.0917
1	1	0.8		1	0.8	0.675	0.7875		1	1.10715	0.964184	1.0917
1	1	0.7875		1	0.7875	0.6125	0.75		1	1.0917	0.89887	1.0472
1	1	0.925		1	0.925	0.7375	0.6375		1	1.29339	1.03288	0.924693
1	1	0.95		1	0.95	0.6875	0.775		1	1.34528	0.977597	1.07658
1	1	0.4875		1	0.4875	0.4375	0.4875		1	0.772897	0.722734	0.772897
1	1	0.875		1	0.875	0.425	0.9125		1	1.20943	0.710114	1.2705
1	1	0.9		1	0.9	0.625	1		1	1.24905	0.911738	1.5708
1	1	1		1	1	0.7375	1		1	1.5708	1.03288	1.5708
1	1	0.475		1	0.475	0.525	0.4875		1	0.760388	0.810409	0.772897
1	1	0.375		1	0.375	0.7625	0.725		1	0.659058	1.06176	1.01878
1	1	0.75		1	0.75	0.6375	0.6125		1	1.0472	0.924693	0.89887
1	1	0.5		1	0.5	0.525	0.525		1	0.785398	0.810409	0.810409
1	1	0.6875		1	0.6875	0.675	0.8875		1	0.977597	0.964184	1.22876
1	1	0.675		1	0.675	0.75	0.625		1	0.964184	1.0472	0.911738
1	1	0.975		1	0.975	0.75	0.975		1	1.41202	1.0472	1.41202
1	1	0.8625		1	0.8625	0.725	0.825		1	1.19092	1.01878	1.13919
1	1	1		1	1	0.725	1		1	1.5708	1.01878	1.5708
1	1	0.75		1	0.75	0.725	0.7625		1	1.0472	1.01878	1.06176
1	1	0.825		1	0.825	0.8	0.8625		1	1.13919	1.10715	1.19092
1	1	1		1	1	0.9	1		1	1.5708	1.24905	1.5708
1	1	0.8875		1	0.8875	0.6875	0.9125		1	1.22876	0.977597	1.2705
1	1	0.8875		1	0.8875	0.5875	0.9125		1	1.22876	0.873351	1.2705
1	1	0.8375		1	0.8375	0.7875	0.975		1	1.15588	1.0917	1.41202
1	1	0.925		1	0.925	0.7375	0.8125		1	1.29339	1.03288	1.12296
1	1	0.85		1	0.85	0.825	0.8625		1	1.1731	1.13919	1.19092
1	1	0.9375		1	0.9375	0.7375	0.9125		1	1.31812	1.03288	1.2705
1	1	0.75		1	0.75	0.55	0.825		1	1.0472	0.835482	1.13919
1	1	0.6125		1	0.6125	0.65	0.8375		1	0.89887	0.937744	1.15588
1	1	0.925		1	0.925	0.7375	0.8375		1	1.29339	1.03288	1.15588
1	1	0.9125		1	0.9125	0.6875	0.8125		1	1.2705	0.977597	1.12296
1	1	0.9375		1	0.9375	0.85	0.9125		1	1.31812	1.1731	1.2705
1	1	0.7375		1	0.7375	0.6125	0.8625		1	1.03288	0.89887	1.19092
1	1	0.95		1	0.95	0.75	0.775		1	1.34528	1.0472	1.07658
1	1	0.8625		1	0.8625	0.7375	1		1	1.19092	1.03288	1.5708
1	1	0.8625		1	0.8625	0.7625	0.7125		1	1.19092	1.06176	1.00488
1	1	0.75		1	0.75	0.7	0.825		1	1.0472	0.991157	1.13919
1	1	0.6875		1	0.6875	0.6375	0.7125		1	0.977597	0.924693	1.00488
1	1	0.7875		1	0.7875	0.75	0.8875		1	1.0917	1.0472	1.22876
1	1	0.825		1	0.825	0.7875	1		1	1.13919	1.0917	1.5708
1	1	0.85		1	0.85	0.7375	0.85		1	1.1731	1.03288	1.1731
1	1	0.75		1	0.75	0.8625	0.8625		1	1.0472	1.19092	1.19092
1	1	1		1	1	0.625	0.8875		1	1.5708	0.911738	1.22876
1	1	0.8625		1	0.8625	0.65	0.9125		1	1.19092	0.937744	1.2705
1	1	0.8625		1	0.8625	0.6625	0.8375		1	1.19092	0.950904	1.15588
1	1	0.65		1	0.65	0.775	0.8375		1	0.937744	1.07658	1.15588
1	1	0.825		1	0.825	0.6375	0.8625		1	1.13919	0.924693	1.19092
1	1	0.8875		1	0.8875	0.7375	0.875		1	1.22876	1.03288	1.20943
1	1	1		1	1	0.7	0.8875		1	1.5708	0.991157	1.22876
1	1	0.925		1	0.925	0.825	0.8375		1	1.29339	1.13919	1.15588
1	1	1		1	1	0.7375	0.95		1	1.5708	1.03288	1.34528
1	1	0.8375		1	0.8375	0.7875	0.85		1	1.15588	1.0917	1.1731
2	1	0.85		2	0.85	0.8875	0.8875		2	1.1731	1.22876	1.22876
2	1	0.7375		2	0.7375	0.8	0.975		2	1.03288	1.10715	1.41202
2	1	1		2	1	0.8625	0.9375		2	1.5708	1.19092	1.31812
2	1	0.7875		2	0.7875	0.8375	0.7875		2	1.0917	1.15588	1.0917
2	1	0.5		2	0.5	0.5375	0.575		2	0.785398	0.822933	0.860682
2	1	1		2	1	0.625	0.975		2	1.5708	0.911738	1.41202
2	1	0.8		2	0.8	0.65	0.7875		2	1.10715	0.937744	1.0917
2	1	0.8875		2	0.8875	0.6875	0.8125		2	1.22876	0.977597	1.12296
2	1	0.85		2	0.85	0.8375	1		2	1.1731	1.15588	1.5708
2	1	1		2	1	0.5125	0.925		2	1.5708	0.797899	1.29339
2	1	1		2	1	0.5625	0.975		2	1.5708	0.848062	1.41202
2	1	0.9125		2	0.9125	0.7375	0.9375		2	1.2705	1.03288	1.31812
2	1	0.925		2	0.925	0.775	0.875		2	1.29339	1.07658	1.20943
2	1	0.775		2	0.775	0.9	0.7875		2	1.07658	1.24905	1.0917
2	1	0.8375		2	0.8375	0.575	0.7375		2	1.15588	0.860682	1.03288
2	1	0.975		2	0.975	0.775	0.9125		2	1.41202	1.07658	1.2705
2	1	0.9375		2	0.9375	0.8625	0.9125		2	1.31812	1.19092	1.2705
2	1	0.9375		2	0.9375	0.8625	1		2	1.31812	1.19092	1.5708
2	1	0.95		2	0.95	0.75	0.8		2	1.34528	1.0472	1.10715
2	1	0.9375		2	0.9375	0.675	1		2	1.31812	0.964184	1.5708
2	1	0.85		2	0.85	0.875	0.975		2	1.1731	1.20943	1.41202
2	1	0.7125		2	0.7125	0.8375	0.7125		2	1.00488	1.15588	1.00488
2	1	0.9125		2	0.9125	0.8125	0.8625		2	1.2705	1.12296	1.19092
2	1	0.9125		2	0.9125	0.8125	1		2	1.2705	1.12296	1.5708
2	1	0.9375		2	0.9375	0.8875	0.9125		2	1.31812	1.22876	1.2705
2	1	0.975		2	0.975	0.8	0.975		2	1.41202	1.10715	1.41202
2	1	0.925		2	0.925	0.8375	0.8875		2	1.29339	1.15588	1.22876
2	1	1		2	1	0.7375	1		2	1.5708	1.03288	1.5708
2	1	0.85		2	0.85	0.7625	0.95		2	1.1731	1.06176	1.34528
2	1	0.85		2	0.85	0.7375	0.9125		2	1.1731	1.03288	1.2705
2	1	0.775		2	0.775	0.725	0.8625		2	1.07658	1.01878	1.19092
2	1	0.7375		2	0.7375	0.7875	0.9		2	1.03288	1.0917	1.24905
2	1	0.975		2	0.975	0.8125	0.9125		2	1.41202	1.12296	1.2705
2	1	0.85		2	0.85	0.8375	0.875		2	1.1731	1.15588	1.20943
2	1	0.7875		2	0.7875	0.575	0.9125		2	1.0917	0.860682	1.2705
1	2	0.6375
1	2	0.5875
1	2	0.55
1	2	0.775
1	2	0.7
1	2	0.7
1	2	0.7125
1	2	0.7125
1	2	0.6
1	2	0.8125
1	2	0.8625
1	2	0.65
1	2	0.7875
1	2	0.7625
1	2	0.675
1	2	0.7125
1	2	0.8875
1	2	0.8875
1	2	0.65
1	2	0.7875
1	2	0.775
1	2	0.525
1	2	0.7875
1	2	0.8875
1	2	0.725
1	2	0.6875
1	2	0.65
1	2	0.5875
1	2	0.575
1	2	0.5875
1	2	0.7625
1	2	0.725
1	2	0.6875
1	2	0.6875
1	2	0.6
1	2	0.8
1	2	0.55
1	2	0.675
1	2	0.8125
1	2	0.5625
1	2	0.725
1	2	0.65
1	2	0.7625
1	2	0.6625
1	2	0.6875
1	2	0.55
1	2	0.725
1	2	0.775
1	2	0.775
1	2	0.7625
1	2	0.75
1	2	0.7625
1	2	0.825
1	2	0.6625
1	2	0.75
1	2	0.8375
1	2	0.7875
1	2	0.825
1	2	0.8625
1	2	0.8375
1	2	0.725
1	2	0.675
1	2	0.825
1	2	0.8125
1	2	0.675
1	2	0.7375
1	2	0.7375
1	2	0.8625
1	2	0.9125
1	2	0.675
1	2	0.7625
1	2	0.7875
1	2	0.8875
1	2	0.8375
1	2	0.675
1	2	0.7375
1	2	0.7875
1	2	0.95
1	2	0.8
1	2	0.7625
1	2	0.725
1	2	0.825
1	2	0.95
1	2	0.8
1	2	0.7125
1	2	0.7375
1	2	0.675
1	2	0.85
1	2	0.6
1	2	0.6875
1	2	0.225
1	2	0.9
1	2	0.725
1	2	0.625
1	2	0.825
1	2	0.725
1	2	0.675
1	2	0.8
1	2	0.8
1	2	0.6875
1	2	0.8125
1	2	0.6
1	2	0.6625
1	2	0.875
1	2	0.7125
1	2	0.525
1	2	0.6375
1	2	0.725
1	2	0.6625
1	2	0.6375
1	2	0.6625
1	2	0.825
1	2	0.7625
1	2	0.725
1	2	0.775
1	2	0.8125
1	2	0.55
1	2	0.8375
1	2	0.7875
1	2	0.825
1	2	0.8875
1	2	0.7375
1	2	0.85
1	2	0.7
1	2	0.725
1	2	0.75
1	2	0.8125
1	2	0.7125
1	2	0.6125
1	2	0.6875
1	2	0.8625
1	2	0.35
1	2	0.8375
1	2	0.7625
1	2	0.6875
1	2	0.4625
1	2	0.575
1	2	0.75
1	2	0.65
1	2	0.85
1	2	0.7
1	2	0.675
1	2	0.6125
1	2	0.7375
1	2	0.6875
1	2	0.4375
1	2	0.425
1	2	0.625
1	2	0.7375
1	2	0.525
1	2	0.7625
1	2	0.6375
1	2	0.525
1	2	0.675
1	2	0.75
1	2	0.75
1	2	0.725
1	2	0.725
1	2	0.725
1	2	0.8
1	2	0.9
1	2	0.6875
1	2	0.5875
1	2	0.7875
1	2	0.7375
1	2	0.825
1	2	0.7375
1	2	0.55
1	2	0.65
1	2	0.7375
1	2	0.6875
1	2	0.85
1	2	0.6125
1	2	0.75
1	2	0.7375
1	2	0.7625
1	2	0.7
1	2	0.6375
1	2	0.75
1	2	0.7875
1	2	0.7375
1	2	0.8625
1	2	0.625
1	2	0.65
1	2	0.6625
1	2	0.775
1	2	0.6375
1	2	0.7375
1	2	0.7
1	2	0.825
1	2	0.7375
1	2	0.7875
2	2	0.8875
2	2	0.8
2	2	0.8625
2	2	0.8375
2	2	0.5375
2	2	0.625
2	2	0.65
2	2	0.6875
2	2	0.8375
2	2	0.5125
2	2	0.5625
2	2	0.7375
2	2	0.775
2	2	0.9
2	2	0.575
2	2	0.775
2	2	0.8625
2	2	0.8625
2	2	0.75
2	2	0.675
2	2	0.875
2	2	0.8375
2	2	0.8125
2	2	0.8125
2	2	0.8875
2	2	0.8
2	2	0.8375
2	2	0.7375
2	2	0.7625
2	2	0.7375
2	2	0.725
2	2	0.7875
2	2	0.8125
2	2	0.8375
2	2	0.575
1	3	0.975
1	3	0.7375
1	3	0.3625
1	3	1
1	3	0.8
1	3	0.8
1	3	0.925
1	3	0.8625
1	3	0.9
1	3	0.9125
1	3	0.9375
1	3	0.8
1	3	0.9125
1	3	0.825
1	3	0.725
1	3	0.825
1	3	0.95
1	3	0.975
1	3	1
1	3	0.825
1	3	0.8625
1	3	0.9125
1	3	0.95
1	3	0.8625
1	3	0.7625
1	3	0.8125
1	3	0.825
1	3	0.475
1	3	0.775
1	3	0.725
1	3	0.8875
1	3	0.825
1	3	0.6125
1	3	0.7375
1	3	0.7125
1	3	0.825
1	3	0.7875
1	3	0.7625
1	3	0.875
1	3	0.925
1	3	0.8625
1	3	0.7875
1	3	0.8125
1	3	0.975
1	3	0.8375
1	3	0.9375
1	3	0.775
1	3	0.85
1	3	0.9375
1	3	0.8
1	3	0.8625
1	3	0.9125
1	3	0.85
1	3	0.7625
1	3	0.8125
1	3	0.95
1	3	0.775
1	3	1
1	3	1
1	3	0.9125
1	3	0.725
1	3	0.9125
1	3	0.975
1	3	0.8125
1	3	0.8375
1	3	1
1	3	0.925
1	3	0.9125
1	3	0.7125
1	3	0.975
1	3	0.9375
1	3	0.7625
1	3	0.8625
1	3	0.85
1	3	0.5125
1	3	0.875
1	3	0.975
1	3	0.975
1	3	0.975
1	3	0.725
1	3	0.7375
1	3	0.9
1	3	0.9375
1	3	0.775
1	3	0.7125
1	3	0.9125
1	3	0.8875
1	3	0.975
1	3	0.85
1	3	0.95
1	3	0.375
1	3	0.9375
1	3	0.9125
1	3	0.8125
1	3	0.975
1	3	0.975
1	3	0.775
1	3	0.9375
1	3	0.7625
1	3	0.6375
1	3	0.9125
1	3	0.8875
1	3	0.6
1	3	0.8875
1	3	0.825
1	3	0.8
1	3	0.7375
1	3	0.9
1	3	0.8625
1	3	0.975
1	3	0.5375
1	3	0.975
1	3	0.925
1	3	0.775
1	3	0.9125
1	3	0.975
1	3	0.825
1	3	0.8
1	3	0.85
1	3	1
1	3	0.975
1	3	0.975
1	3	0.75
1	3	0.85
1	3	0.8875
1	3	0.8375
1	3	0.8625
1	3	0.8625
1	3	0.875
1	3	0.975
1	3	0.85
1	3	0.6
1	3	0.925
1	3	0.8
1	3	0.8
1	3	0.7
1	3	0.525
1	3	0.8625
1	3	0.95
1	3	0.7375
1	3	0.7875
1	3	0.7875
1	3	0.75
1	3	0.6375
1	3	0.775
1	3	0.4875
1	3	0.9125
1	3	1
1	3	1
1	3	0.4875
1	3	0.725
1	3	0.6125
1	3	0.525
1	3	0.8875
1	3	0.625
1	3	0.975
1	3	0.825
1	3	1
1	3	0.7625
1	3	0.8625
1	3	1
1	3	0.9125
1	3	0.9125
1	3	0.975
1	3	0.8125
1	3	0.8625
1	3	0.9125
1	3	0.825
1	3	0.8375
1	3	0.8375
1	3	0.8125
1	3	0.9125
1	3	0.8625
1	3	0.775
1	3	1
1	3	0.7125
1	3	0.825
1	3	0.7125
1	3	0.8875
1	3	1
1	3	0.85
1	3	0.8625
1	3	0.8875
1	3	0.9125
1	3	0.8375
1	3	0.8375
1	3	0.8625
1	3	0.875
1	3	0.8875
1	3	0.8375
1	3	0.95
1	3	0.85
2	3	0.8875
2	3	0.975
2	3	0.9375
2	3	0.7875
2	3	0.575
2	3	0.975
2	3	0.7875
2	3	0.8125
2	3	1
2	3	0.925
2	3	0.975
2	3	0.9375
2	3	0.875
2	3	0.7875
2	3	0.7375
2	3	0.9125
2	3	0.9125
2	3	1
2	3	0.8
2	3	1
2	3	0.975
2	3	0.7125
2	3	0.8625
2	3	1
2	3	0.9125
2	3	0.975
2	3	0.8875
2	3	1
2	3	0.95
2	3	0.9125
2	3	0.8625
2	3	0.9
2	3	0.9125
2	3	0.875
2	3	0.9125

## Sheet: Expertise vs. DIS
1Non 2Expert	1Cap 2CT	Accuracy		Expertise	Cam1	Cam2		Expertise	Cam1	Cam2
1	1	0.866667		1	0.866667	0.791667		1	1.197	1.09681
1	1	0.616667		1	0.616667	0.708333		1	0.90315	1.00029
1	1	0.633333		1	0.633333	0.375		1	0.920365	0.659058
1	1	0.916667		1	0.916667	0.791667		1	1.27795	1.09681
1	1	0.766667		1	0.766667	0.833333		1	1.06667	1.15026
1	1	0.816667		1	0.816667	0.791667		1	1.12832	1.09681
1	1	0.866667		1	0.866667	0.833333		1	1.197	1.15026
1	1	0.816667		1	0.816667	0.666667		1	1.12832	0.955317
1	1	0.783333		1	0.783333	0.791667		1	1.08663	1.09681
1	1	0.866667		1	0.866667	0.916667		1	1.197	1.27795
1	1	0.933333		1	0.933333	0.833333		1	1.30964	1.15026
1	1	0.85		1	0.85	0.708333		1	1.1731	1.00029
1	1	0.85		1	0.85	0.916667		1	1.1731	1.27795
1	1	0.833333		1	0.833333	0.791667		1	1.15026	1.09681
1	1	0.633333		1	0.633333	0.75		1	0.920365	1.0472
1	1	0.866667		1	0.866667	0.708333		1	1.197	1.00029
1	1	0.916667		1	0.916667	0.916667		1	1.27795	1.27795
1	1	0.95		1	0.95	0.916667		1	1.34528	1.27795
1	1	0.933333		1	0.933333	0.791667		1	1.30964	1.09681
1	1	0.85		1	0.85	0.875		1	1.1731	1.20943
1	1	0.866667		1	0.866667	0.875		1	1.197	1.20943
1	1	0.766667		1	0.766667	0.583333		1	1.06667	0.869122
1	1	0.933333		1	0.933333	0.875		1	1.30964	1.20943
1	1	0.9		1	0.9	0.916667		1	1.24905	1.27795
1	1	0.833333		1	0.833333	0.666667		1	1.15026	0.955317
1	1	0.8		1	0.8	0.75		1	1.10715	1.0472
1	1	0.866667		1	0.866667	0.75		1	1.197	1.0472
1	1	0.533333		1	0.533333	0.458333		1	0.818756	0.743683
1	1	0.733333		1	0.733333	0.5		1	1.02816	0.785398
1	1	0.666667		1	0.666667	0.75		1	0.955317	1.0472
1	1	0.8		1	0.8	0.875		1	1.10715	1.20943
1	1	0.85		1	0.85	0.791667		1	1.1731	1.09681
1	1	0.733333		1	0.733333	0.625		1	1.02816	0.911738
1	1	0.8		1	0.8	0.666667		1	1.10715	0.955317
1	1	0.766667		1	0.766667	0.666667		1	1.06667	0.955317
1	1	0.816667		1	0.816667	0.75		1	1.12832	1.0472
1	1	0.733333		1	0.733333	0.75		1	1.02816	1.0472
1	1	0.75		1	0.75	0.75		1	1.0472	1.0472
1	1	0.75		1	0.75	0.958333		1	1.0472	1.36523
1	1	0.783333		1	0.783333	0.75		1	1.08663	1.0472
1	1	0.8		1	0.8	0.75		1	1.10715	1.0472
1	1	0.716667		1	0.716667	0.833333		1	1.00949	1.15026
1	1	0.766667		1	0.766667	0.916667		1	1.06667	1.27795
1	1	0.833333		1	0.833333	0.875		1	1.15026	1.20943
1	1	0.8		1	0.8	0.75		1	1.10715	1.0472
1	1	0.866667		1	0.866667	0.708333		1	1.197	1.00029
1	1	0.7		1	0.7	0.75		1	0.991157	1.0472
1	1	0.9		1	0.9	0.708333		1	1.24905	1.00029
1	1	0.883333		1	0.883333	0.875		1	1.22221	1.20943
1	1	0.783333		1	0.783333	0.791667		1	1.08663	1.09681
1	1	0.833333		1	0.833333	0.833333		1	1.15026	1.15026
1	1	0.95		1	0.95	0.791667		1	1.34528	1.09681
1	1	0.7		1	0.7	0.916667		1	0.991157	1.27795
1	1	0.8		1	0.8	0.666667		1	1.10715	0.955317
1	1	0.666667		1	0.666667	0.708333		1	0.955317	1.00029
1	1	0.883333		1	0.883333	0.875		1	1.22221	1.20943
1	1	0.766667		1	0.766667	0.75		1	1.06667	1.0472
1	1	0.95		1	0.95	0.916667		1	1.34528	1.27795
1	1	0.933333		1	0.933333	0.916667		1	1.30964	1.27795
1	1	0.883333		1	0.883333	0.916667		1	1.22221	1.27795
1	1	0.8		1	0.8	0.75		1	1.10715	1.0472
1	1	0.883333		1	0.883333	0.791667		1	1.22221	1.09681
1	1	0.95		1	0.95	0.916667		1	1.34528	1.27795
1	1	0.783333		1	0.783333	0.833333		1	1.08663	1.15026
1	1	0.733333		1	0.733333	0.833333		1	1.02816	1.15026
1	1	0.95		1	0.95	0.833333		1	1.34528	1.15026
1	1	0.75		1	0.75	0.833333		1	1.0472	1.15026
1	1	0.916667		1	0.916667	0.875		1	1.27795	1.20943
1	1	0.883333		1	0.883333	0.791667		1	1.22221	1.09681
1	1	0.9		1	0.9	0.833333		1	1.24905	1.15026
1	1	0.883333		1	0.883333	0.916667		1	1.22221	1.27795
1	1	0.833333		1	0.833333	0.75		1	1.15026	1.0472
1	1	0.9		1	0.9	0.875		1	1.24905	1.20943
1	1	0.866667		1	0.866667	0.833333		1	1.197	1.15026
1	1	0.5		1	0.5	0.541667		1	0.785398	0.827113
1	1	0.933333		1	0.933333	0.708333		1	1.30964	1.00029
1	1	0.866667		1	0.866667	0.916667		1	1.197	1.27795
1	1	0.933333		1	0.933333	1		1	1.30964	1.5708
1	1	0.916667		1	0.916667	0.833333		1	1.27795	1.15026
1	1	0.683333		1	0.683333	0.75		1	0.97311	1.0472
1	1	0.766667		1	0.766667	0.75		1	1.06667	1.0472
1	1	0.833333		1	0.833333	0.875		1	1.15026	1.20943
1	1	0.9		1	0.9	0.958333		1	1.24905	1.36523
1	1	0.7		1	0.7	0.833333		1	0.991157	1.15026
1	1	0.766667		1	0.766667	0.75		1	1.06667	1.0472
1	1	0.8		1	0.8	0.791667		1	1.10715	1.09681
1	1	0.766667		1	0.766667	0.833333		1	1.06667	1.15026
1	1	0.95		1	0.95	0.875		1	1.34528	1.20943
1	1	0.833333		1	0.833333	0.666667		1	1.15026	0.955317
1	1	0.833333		1	0.833333	0.791667		1	1.15026	1.09681
1	1	0.4		1	0.4	0.291667		1	0.684719	0.57051
1	1	0.85		1	0.85	0.916667		1	1.1731	1.27795
1	1	0.883333		1	0.883333	0.791667		1	1.22221	1.09681
1	1	0.683333		1	0.683333	0.708333		1	0.97311	1.00029
1	1	0.95		1	0.95	0.875		1	1.34528	1.20943
1	1	0.8		1	0.8	0.875		1	1.10715	1.20943
1	1	0.733333		1	0.733333	0.791667		1	1.02816	1.09681
1	1	0.9		1	0.9	0.791667		1	1.24905	1.09681
1	1	0.816667		1	0.816667	0.75		1	1.12832	1.0472
1	1	0.583333		1	0.583333	0.833333		1	0.869122	1.15026
1	1	0.9		1	0.9	0.833333		1	1.24905	1.15026
1	1	0.85		1	0.85	0.708333		1	1.1731	1.00029
1	1	0.666667		1	0.666667	0.708333		1	0.955317	1.00029
1	1	0.766667		1	0.766667	0.916667		1	1.06667	1.27795
1	1	0.75		1	0.75	0.875		1	1.0472	1.20943
1	1	0.65		1	0.65	0.625		1	0.937744	0.911738
1	1	0.783333		1	0.783333	0.708333		1	1.08663	1.00029
1	1	0.833333		1	0.833333	0.875		1	1.15026	1.20943
1	1	0.833333		1	0.833333	0.833333		1	1.15026	1.15026
1	1	0.816667		1	0.816667	0.791667		1	1.12832	1.09681
1	1	0.65		1	0.65	0.625		1	0.937744	0.911738
1	1	0.95		1	0.95	0.875		1	1.34528	1.20943
1	1	0.733333		1	0.733333	0.833333		1	1.02816	1.15026
1	1	0.766667		1	0.766667	0.666667		1	1.06667	0.955317
1	1	0.883333		1	0.883333	0.791667		1	1.22221	1.09681
1	1	0.9		1	0.9	0.916667		1	1.24905	1.27795
1	1	0.833333		1	0.833333	0.708333		1	1.15026	1.00029
1	1	0.783333		1	0.783333	0.75		1	1.08663	1.0472
1	1	0.85		1	0.85	0.875		1	1.1731	1.20943
1	1	0.966667		1	0.966667	0.916667		1	1.38719	1.27795
1	1	0.9		1	0.9	0.916667		1	1.24905	1.27795
1	1	0.9		1	0.9	0.75		1	1.24905	1.0472
1	1	0.8		1	0.8	0.875		1	1.10715	1.20943
1	1	0.85		1	0.85	0.708333		1	1.1731	1.00029
1	1	0.783333		1	0.783333	0.791667		1	1.08663	1.09681
1	1	0.783333		1	0.783333	0.833333		1	1.08663	1.15026
1	1	0.833333		1	0.833333	0.791667		1	1.15026	1.09681
1	1	0.833333		1	0.833333	0.75		1	1.15026	1.0472
1	1	0.733333		1	0.733333	0.833333		1	1.02816	1.15026
1	1	0.9		1	0.9	0.875		1	1.24905	1.20943
1	1	0.9		1	0.9	0.791667		1	1.24905	1.09681
1	1	0.55		1	0.55	0.5		1	0.835482	0.785398
1	1	0.8		1	0.8	0.875		1	1.10715	1.20943
1	1	0.75		1	0.75	0.75		1	1.0472	1.0472
1	1	0.85		1	0.85	0.708333		1	1.1731	1.00029
1	1	0.6		1	0.6	0.583333		1	0.886077	0.869122
1	1	0.566667		1	0.566667	0.666667		1	0.852264	0.955317
1	1	0.8		1	0.8	0.833333		1	1.10715	1.15026
1	1	0.816667		1	0.816667	0.875		1	1.12832	1.20943
1	1	0.783333		1	0.783333	0.791667		1	1.08663	1.09681
1	1	0.816667		1	0.816667	0.708333		1	1.12832	1.00029
1	1	0.8		1	0.8	0.708333		1	1.10715	1.00029
1	1	0.683333		1	0.683333	0.75		1	0.97311	1.0472
1	1	0.783333		1	0.783333	0.75		1	1.08663	1.0472
1	1	0.816667		1	0.816667	0.791667		1	1.12832	1.09681
1	1	0.483333		1	0.483333	0.458333		1	0.768728	0.743683
1	1	0.85		1	0.85	0.625		1	1.1731	0.911738
1	1	0.85		1	0.85	0.833333		1	1.1731	1.15026
1	1	0.95		1	0.95	0.875		1	1.34528	1.20943
1	1	0.616667		1	0.616667	0.375		1	0.90315	0.659058
1	1	0.616667		1	0.616667	0.625		1	0.90315	0.911738
1	1	0.666667		1	0.666667	0.666667		1	0.955317	0.955317
1	1	0.533333		1	0.533333	0.5		1	0.818756	0.785398
1	1	0.75		1	0.75	0.75		1	1.0472	1.0472
1	1	0.7		1	0.7	0.666667		1	0.991157	0.955317
1	1	0.883333		1	0.883333	0.916667		1	1.22221	1.27795
1	1	0.816667		1	0.816667	0.791667		1	1.12832	1.09681
1	1	0.9		1	0.9	0.916667		1	1.24905	1.27795
1	1	0.783333		1	0.783333	0.708333		1	1.08663	1.00029
1	1	0.866667		1	0.866667	0.791667		1	1.197	1.09681
1	1	0.933333		1	0.933333	1		1	1.30964	1.5708
1	1	0.866667		1	0.866667	0.791667		1	1.197	1.09681
1	1	0.8		1	0.8	0.791667		1	1.10715	1.09681
1	1	0.816667		1	0.816667	0.916667		1	1.12832	1.27795
1	1	0.733333		1	0.733333	0.916667		1	1.02816	1.27795
1	1	0.9		1	0.9	0.791667		1	1.24905	1.09681
1	1	0.933333		1	0.933333	0.791667		1	1.30964	1.09681
1	1	0.75		1	0.75	0.666667		1	1.0472	0.955317
1	1	0.566667		1	0.566667	0.833333		1	0.852264	1.15026
1	1	0.75		1	0.75	0.916667		1	1.0472	1.27795
1	1	0.9		1	0.9	0.708333		1	1.24905	1.00029
1	1	0.883333		1	0.883333	0.916667		1	1.22221	1.27795
1	1	0.766667		1	0.766667	0.708333		1	1.06667	1.00029
1	1	0.816667		1	0.816667	0.833333		1	1.12832	1.15026
1	1	0.9		1	0.9	0.833333		1	1.24905	1.15026
1	1	0.766667		1	0.766667	0.791667		1	1.06667	1.09681
1	1	0.766667		1	0.766667	0.75		1	1.06667	1.0472
1	1	0.733333		1	0.733333	0.625		1	1.02816	0.911738
1	1	0.866667		1	0.866667	0.75		1	1.197	1.0472
1	1	0.95		1	0.95	0.791667		1	1.34528	1.09681
1	1	0.916667		1	0.916667	0.708333		1	1.27795	1.00029
1	1	0.816667		1	0.816667	0.833333		1	1.12832	1.15026
1	1	0.883333		1	0.883333	0.791667		1	1.22221	1.09681
1	1	0.866667		1	0.866667	0.75		1	1.197	1.0472
1	1	0.783333		1	0.783333	0.791667		1	1.08663	1.09681
1	1	0.8		1	0.8	0.708333		1	1.10715	1.00029
1	1	0.716667		1	0.716667	0.833333		1	1.00949	1.15026
1	1	0.916667		1	0.916667	0.75		1	1.27795	1.0472
1	1	0.85		1	0.85	0.875		1	1.1731	1.20943
1	1	0.766667		1	0.766667	0.958333		1	1.06667	1.36523
1	1	0.916667		1	0.916667	0.875		1	1.27795	1.20943
1	1	0.816667		1	0.816667	0.833333		1	1.12832	1.15026
2	1	0.916667		2	0.916667	0.833333		2	1.27795	1.15026
2	1	0.883333		2	0.883333	0.791667		2	1.22221	1.09681
2	1	0.95		2	0.95	0.916667		2	1.34528	1.27795
2	1	0.9		2	0.9	0.708333		2	1.24905	1.00029
2	1	0.533333		2	0.533333	0.541667		2	0.818756	0.827113
2	1	0.9		2	0.9	0.833333		2	1.24905	1.15026
2	1	0.7		2	0.7	0.791667		2	0.991157	1.09681
2	1	0.8		2	0.8	0.791667		2	1.10715	1.09681
2	1	0.916667		2	0.916667	0.875		2	1.27795	1.20943
2	1	0.833333		2	0.833333	0.791667		2	1.15026	1.09681
2	1	0.9		2	0.9	0.791667		2	1.24905	1.09681
2	1	0.933333		2	0.933333	0.791667		2	1.30964	1.09681
2	1	0.883333		2	0.883333	0.833333		2	1.22221	1.15026
2	1	0.766667		2	0.766667	0.875		2	1.06667	1.20943
2	1	0.766667		2	0.766667	0.666667		2	1.06667	0.955317
2	1	0.9		2	0.9	0.875		2	1.24905	1.20943
2	1	0.933333		2	0.933333	0.875		2	1.30964	1.20943
2	1	0.95		2	0.95	0.916667		2	1.34528	1.27795
2	1	0.833333		2	0.833333	0.833333		2	1.15026	1.15026
2	1	0.95		2	0.95	0.791667		2	1.34528	1.09681
2	1	0.883333		2	0.883333	0.916667		2	1.22221	1.27795
2	1	0.8		2	0.8	0.708333		2	1.10715	1.00029
2	1	0.85		2	0.85	0.875		2	1.1731	1.20943
2	1	0.9		2	0.9	0.916667		2	1.24905	1.27795
2	1	0.95		2	0.95	0.875		2	1.34528	1.20943
2	1	0.916667		2	0.916667	0.916667		2	1.27795	1.27795
2	1	0.85		2	0.85	0.916667		2	1.1731	1.27795
2	1	0.95		2	0.95	0.875		2	1.34528	1.20943
2	1	0.833333		2	0.833333	0.875		2	1.15026	1.20943
2	1	0.916667		2	0.916667	0.75		2	1.27795	1.0472
2	1	0.783333		2	0.783333	0.791667		2	1.08663	1.09681
2	1	0.866667		2	0.866667	0.75		2	1.197	1.0472
2	1	0.883333		2	0.883333	0.916667		2	1.22221	1.27795
2	1	0.916667		2	0.916667	0.791667		2	1.27795	1.09681
2	1	0.85		2	0.85	0.666667		2	1.1731	0.955317
1	2	0.791667
1	2	0.708333
1	2	0.375
1	2	0.791667
1	2	0.833333
1	2	0.791667
1	2	0.833333
1	2	0.666667
1	2	0.791667
1	2	0.916667
1	2	0.833333
1	2	0.708333
1	2	0.916667
1	2	0.791667
1	2	0.75
1	2	0.708333
1	2	0.916667
1	2	0.916667
1	2	0.791667
1	2	0.875
1	2	0.875
1	2	0.583333
1	2	0.875
1	2	0.916667
1	2	0.666667
1	2	0.75
1	2	0.75
1	2	0.458333
1	2	0.5
1	2	0.75
1	2	0.875
1	2	0.791667
1	2	0.625
1	2	0.666667
1	2	0.666667
1	2	0.75
1	2	0.75
1	2	0.75
1	2	0.958333
1	2	0.75
1	2	0.75
1	2	0.833333
1	2	0.916667
1	2	0.875
1	2	0.75
1	2	0.708333
1	2	0.75
1	2	0.708333
1	2	0.875
1	2	0.791667
1	2	0.833333
1	2	0.791667
1	2	0.916667
1	2	0.666667
1	2	0.708333
1	2	0.875
1	2	0.75
1	2	0.916667
1	2	0.916667
1	2	0.916667
1	2	0.75
1	2	0.791667
1	2	0.916667
1	2	0.833333
1	2	0.833333
1	2	0.833333
1	2	0.833333
1	2	0.875
1	2	0.791667
1	2	0.833333
1	2	0.916667
1	2	0.75
1	2	0.875
1	2	0.833333
1	2	0.541667
1	2	0.708333
1	2	0.916667
1	2	1
1	2	0.833333
1	2	0.75
1	2	0.75
1	2	0.875
1	2	0.958333
1	2	0.833333
1	2	0.75
1	2	0.791667
1	2	0.833333
1	2	0.875
1	2	0.666667
1	2	0.791667
1	2	0.291667
1	2	0.916667
1	2	0.791667
1	2	0.708333
1	2	0.875
1	2	0.875
1	2	0.791667
1	2	0.791667
1	2	0.75
1	2	0.833333
1	2	0.833333
1	2	0.708333
1	2	0.708333
1	2	0.916667
1	2	0.875
1	2	0.625
1	2	0.708333
1	2	0.875
1	2	0.833333
1	2	0.791667
1	2	0.625
1	2	0.875
1	2	0.833333
1	2	0.666667
1	2	0.791667
1	2	0.916667
1	2	0.708333
1	2	0.75
1	2	0.875
1	2	0.916667
1	2	0.916667
1	2	0.75
1	2	0.875
1	2	0.708333
1	2	0.791667
1	2	0.833333
1	2	0.791667
1	2	0.75
1	2	0.833333
1	2	0.875
1	2	0.791667
1	2	0.5
1	2	0.875
1	2	0.75
1	2	0.708333
1	2	0.583333
1	2	0.666667
1	2	0.833333
1	2	0.875
1	2	0.791667
1	2	0.708333
1	2	0.708333
1	2	0.75
1	2	0.75
1	2	0.791667
1	2	0.458333
1	2	0.625
1	2	0.833333
1	2	0.875
1	2	0.375
1	2	0.625
1	2	0.666667
1	2	0.5
1	2	0.75
1	2	0.666667
1	2	0.916667
1	2	0.791667
1	2	0.916667
1	2	0.708333
1	2	0.791667
1	2	1
1	2	0.791667
1	2	0.791667
1	2	0.916667
1	2	0.916667
1	2	0.791667
1	2	0.791667
1	2	0.666667
1	2	0.833333
1	2	0.916667
1	2	0.708333
1	2	0.916667
1	2	0.708333
1	2	0.833333
1	2	0.833333
1	2	0.791667
1	2	0.75
1	2	0.625
1	2	0.75
1	2	0.791667
1	2	0.708333
1	2	0.833333
1	2	0.791667
1	2	0.75
1	2	0.791667
1	2	0.708333
1	2	0.833333
1	2	0.75
1	2	0.875
1	2	0.958333
1	2	0.875
1	2	0.833333
2	2	0.833333
2	2	0.791667
2	2	0.916667
2	2	0.708333
2	2	0.541667
2	2	0.833333
2	2	0.791667
2	2	0.791667
2	2	0.875
2	2	0.791667
2	2	0.791667
2	2	0.791667
2	2	0.833333
2	2	0.875
2	2	0.666667
2	2	0.875
2	2	0.875
2	2	0.916667
2	2	0.833333
2	2	0.791667
2	2	0.916667
2	2	0.708333
2	2	0.875
2	2	0.916667
2	2	0.875
2	2	0.916667
2	2	0.916667
2	2	0.875
2	2	0.875
2	2	0.75
2	2	0.791667
2	2	0.75
2	2	0.916667
2	2	0.791667
2	2	0.666667

## Sheet: Expertise vs. PT
1Non 2Expert	1mis 2mat	mean %		Expertise	Match?	Mismatch?		Expertise	Match?	Mismatch?
1	1	0.916667		1	0.916667	0.741667		1	1.27795	1.03763
1	1	0.908333		1	0.908333	0.416667		1	1.2632	0.701674
1	1	0.625		1	0.625	0.383333		1	0.911738	0.667646
1	1	0.925		1	0.925	0.783333		1	1.29339	1.08663
1	1	0.766667		1	0.766667	0.833333		1	1.06667	1.15026
1	1	0.9		1	0.9	0.708333		1	1.24905	1.00029
1	1	0.775		1	0.775	0.925		1	1.07658	1.29339
1	1	0.658333		1	0.658333	0.825		1	0.946505	1.13919
1	1	0.608333		1	0.608333	0.966667		1	0.894598	1.38719
1	1	0.875		1	0.875	0.908333		1	1.20943	1.2632
1	1	0.941667		1	0.941667	0.825		1	1.32686	1.13919
1	1	0.783333		1	0.783333	0.775		1	1.08663	1.07658
1	1	0.891667		1	0.891667	0.875		1	1.2354	1.20943
1	1	0.791667		1	0.791667	0.833333		1	1.09681	1.15026
1	1	0.516667		1	0.516667	0.866667		1	0.802068	1.197
1	1	0.675		1	0.675	0.9		1	0.964184	1.24905
1	1	0.925		1	0.925	0.908333		1	1.29339	1.2632
1	1	0.983333		1	0.983333	0.883333		1	1.44134	1.22221
1	1	0.9		1	0.9	0.825		1	1.24905	1.13919
1	1	0.925		1	0.925	0.8		1	1.29339	1.10715
1	1	0.816667		1	0.816667	0.925		1	1.12832	1.29339
1	1	0.75		1	0.75	0.6		1	1.0472	0.886077
1	1	0.883333		1	0.883333	0.925		1	1.22221	1.29339
1	1	0.85		1	0.85	0.966667		1	1.1731	1.38719
1	1	0.691667		1	0.691667	0.808333		1	0.982099	1.11765
1	1	0.641667		1	0.641667	0.908333		1	0.929032	1.2632
1	1	0.808333		1	0.808333	0.808333		1	1.11765	1.11765
1	1	0.216667		1	0.216667	0.775		1	0.484171	1.07658
1	1	0.466667		1	0.466667	0.766667		1	0.75204	1.06667
1	1	0.525		1	0.525	0.891667		1	0.810409	1.2354
1	1	0.8		1	0.8	0.875		1	1.10715	1.20943
1	1	0.733333		1	0.733333	0.908333		1	1.02816	1.2632
1	1	0.891667		1	0.891667	0.466667		1	1.2354	0.75204
1	1	0.625		1	0.625	0.841667		1	0.911738	1.16156
1	1	0.55		1	0.55	0.883333		1	0.835482	1.22221
1	1	0.633333		1	0.633333	0.933333		1	0.920365	1.30964
1	1	0.908333		1	0.908333	0.575		1	1.2632	0.860682
1	1	0.758333		1	0.758333	0.741667		1	1.05687	1.03763
1	1	0.916667		1	0.916667	0.791667		1	1.27795	1.09681
1	1	0.758333		1	0.758333	0.775		1	1.05687	1.07658
1	1	0.666667		1	0.666667	0.883333		1	0.955317	1.22221
1	1	0.858333		1	0.858333	0.691667		1	1.1849	0.982099
1	1	0.791667		1	0.791667	0.891667		1	1.09681	1.2354
1	1	0.741667		1	0.741667	0.966667		1	1.03763	1.38719
1	1	0.766667		1	0.766667	0.783333		1	1.06667	1.08663
1	1	0.9		1	0.9	0.675		1	1.24905	0.964184
1	1	0.625		1	0.625	0.825		1	0.911738	1.13919
1	1	0.9		1	0.9	0.708333		1	1.24905	1.00029
1	1	0.916667		1	0.916667	0.841667		1	1.27795	1.16156
1	1	0.791667		1	0.791667	0.783333		1	1.09681	1.08663
1	1	0.875		1	0.875	0.791667		1	1.20943	1.09681
1	1	0.816667		1	0.816667	0.925		1	1.12832	1.29339
1	1	0.875		1	0.875	0.741667		1	1.20943	1.03763
1	1	0.625		1	0.625	0.841667		1	0.911738	1.16156
1	1	0.666667		1	0.666667	0.708333		1	0.955317	1.00029
1	1	0.925		1	0.925	0.833333		1	1.29339	1.15026
1	1	0.8		1	0.8	0.716667		1	1.10715	1.00949
1	1	0.9		1	0.9	0.966667		1	1.24905	1.38719
1	1	0.958333		1	0.958333	0.891667		1	1.36523	1.2354
1	1	0.966667		1	0.966667	0.833333		1	1.38719	1.15026
1	1	0.925		1	0.925	0.625		1	1.29339	0.911738
1	1	0.775		1	0.775	0.9		1	1.07658	1.24905
1	1	0.983333		1	0.983333	0.883333		1	1.44134	1.22221
1	1	0.883333		1	0.883333	0.733333		1	1.22221	1.02816
1	1	0.783333		1	0.783333	0.783333		1	1.08663	1.08663
1	1	0.916667		1	0.916667	0.866667		1	1.27795	1.197
1	1	0.691667		1	0.691667	0.891667		1	0.982099	1.2354
1	1	0.841667		1	0.841667	0.95		1	1.16156	1.34528
1	1	0.891667		1	0.891667	0.783333		1	1.2354	1.08663
1	1	0.808333		1	0.808333	0.925		1	1.11765	1.29339
1	1	0.833333		1	0.833333	0.966667		1	1.15026	1.38719
1	1	0.65		1	0.65	0.933333		1	0.937744	1.30964
1	1	0.941667		1	0.941667	0.833333		1	1.32686	1.15026
1	1	0.85		1	0.85	0.85		1	1.1731	1.1731
1	1	0.716667		1	0.716667	0.325		1	1.00949	0.606613
1	1	0.8		1	0.8	0.841667		1	1.10715	1.16156
1	1	0.933333		1	0.933333	0.85		1	1.30964	1.1731
1	1	0.966667		1	0.966667	0.966667		1	1.38719	1.38719
1	1	0.791667		1	0.791667	0.958333		1	1.09681	1.36523
1	1	0.5		1	0.5	0.933333		1	0.785398	1.30964
1	1	0.875		1	0.875	0.641667		1	1.20943	0.929032
1	1	0.8		1	0.8	0.908333		1	1.10715	1.2632
1	1	0.925		1	0.925	0.933333		1	1.29339	1.30964
1	1	0.75		1	0.75	0.783333		1	1.0472	1.08663
1	1	0.875		1	0.875	0.641667		1	1.20943	0.929032
1	1	0.783333		1	0.783333	0.808333		1	1.08663	1.11765
1	1	0.891667		1	0.891667	0.708333		1	1.2354	1.00029
1	1	0.866667		1	0.866667	0.958333		1	1.197	1.36523
1	1	0.7		1	0.7	0.8		1	0.991157	1.10715
1	1	0.658333		1	0.658333	0.966667		1	0.946505	1.38719
1	1	0.408333		1	0.408333	0.283333		1	0.69321	0.561304
1	1	0.908333		1	0.908333	0.858333		1	1.2632	1.1849
1	1	0.941667		1	0.941667	0.733333		1	1.32686	1.02816
1	1	0.791667		1	0.791667	0.6		1	1.09681	0.886077
1	1	0.858333		1	0.858333	0.966667		1	1.1849	1.38719
1	1	0.808333		1	0.808333	0.866667		1	1.11765	1.197
1	1	0.966667		1	0.966667	0.558333		1	1.38719	0.843865
1	1	0.808333		1	0.808333	0.883333		1	1.11765	1.22221
1	1	0.816667		1	0.816667	0.75		1	1.12832	1.0472
1	1	0.633333		1	0.633333	0.783333		1	0.920365	1.08663
1	1	0.941667		1	0.941667	0.791667		1	1.32686	1.09681
1	1	0.825		1	0.825	0.733333		1	1.13919	1.02816
1	1	0.483333		1	0.483333	0.891667		1	0.768728	1.2354
1	1	0.716667		1	0.716667	0.966667		1	1.00949	1.38719
1	1	0.716667		1	0.716667	0.908333		1	1.00949	1.2632
1	1	0.541667		1	0.541667	0.733333		1	0.827113	1.02816
1	1	0.775		1	0.775	0.716667		1	1.07658	1.00949
1	1	0.833333		1	0.833333	0.875		1	1.15026	1.20943
1	1	0.925		1	0.925	0.741667		1	1.29339	1.03763
1	1	0.608333		1	0.608333	1		1	0.894598	1.5708
1	1	0.85		1	0.85	0.425		1	1.1731	0.710114
1	1	0.9		1	0.9	0.925		1	1.24905	1.29339
1	1	0.75		1	0.75	0.816667		1	1.0472	1.12832
1	1	0.558333		1	0.558333	0.875		1	0.843865	1.20943
1	1	0.833333		1	0.833333	0.841667		1	1.15026	1.16156
1	1	0.908333		1	0.908333	0.908333		1	1.2632	1.2632
1	1	0.891667		1	0.891667	0.65		1	1.2354	0.937744
1	1	0.866667		1	0.866667	0.666667		1	1.197	0.955317
1	1	0.966667		1	0.966667	0.758333		1	1.38719	1.05687
1	1	0.916667		1	0.916667	0.966667		1	1.27795	1.38719
1	1	0.866667		1	0.866667	0.95		1	1.197	1.34528
1	1	0.683333		1	0.683333	0.966667		1	0.97311	1.38719
1	1	0.983333		1	0.983333	0.691667		1	1.44134	0.982099
1	1	0.691667		1	0.691667	0.866667		1	0.982099	1.197
1	1	0.608333		1	0.608333	0.966667		1	0.894598	1.38719
1	1	0.791667		1	0.791667	0.825		1	1.09681	1.13919
1	1	0.866667		1	0.866667	0.758333		1	1.197	1.05687
1	1	0.758333		1	0.758333	0.825		1	1.05687	1.13919
1	1	0.908333		1	0.908333	0.658333		1	1.2632	0.946505
1	1	0.916667		1	0.916667	0.858333		1	1.27795	1.1849
1	1	0.941667		1	0.941667	0.75		1	1.32686	1.0472
1	1	0.491667		1	0.491667	0.558333		1	0.777064	0.843865
1	1	0.85		1	0.85	0.825		1	1.1731	1.13919
1	1	0.8		1	0.8	0.7		1	1.10715	0.991157
1	1	0.8		1	0.8	0.758333		1	1.10715	1.05687
1	1	0.491667		1	0.491667	0.691667		1	0.777064	0.982099
1	1	0.391667		1	0.391667	0.841667		1	0.676199	1.16156
1	1	0.883333		1	0.883333	0.75		1	1.22221	1.0472
1	1	0.783333		1	0.783333	0.908333		1	1.08663	1.2632
1	1	0.833333		1	0.833333	0.741667		1	1.15026	1.03763
1	1	0.683333		1	0.683333	0.841667		1	0.97311	1.16156
1	1	0.875		1	0.875	0.633333		1	1.20943	0.920365
1	1	0.516667		1	0.516667	0.916667		1	0.802068	1.27795
1	1	0.816667		1	0.816667	0.716667		1	1.12832	1.00949
1	1	0.683333		1	0.683333	0.925		1	0.97311	1.29339
1	1	0.391667		1	0.391667	0.55		1	0.676199	0.835482
1	1	0.625		1	0.625	0.85		1	0.911738	1.1731
1	1	0.791667		1	0.791667	0.891667		1	1.09681	1.2354
1	1	0.858333		1	0.858333	0.966667		1	1.1849	1.38719
1	1	0.166667		1	0.166667	0.825		1	0.420534	1.13919
1	1	0.433333		1	0.433333	0.808333		1	0.718532	1.11765
1	1	0.708333		1	0.708333	0.625		1	1.00029	0.911738
1	1	0.075		1	0.075	0.958333		1	0.277406	1.36523
1	1	0.625		1	0.625	0.875		1	0.911738	1.20943
1	1	0.516667		1	0.516667	0.85		1	0.802068	1.1731
1	1	0.908333		1	0.908333	0.891667		1	1.2632	1.2354
1	1	0.758333		1	0.758333	0.85		1	1.05687	1.1731
1	1	0.958333		1	0.958333	0.858333		1	1.36523	1.1849
1	1	0.716667		1	0.716667	0.775		1	1.00949	1.07658
1	1	0.733333		1	0.733333	0.925		1	1.02816	1.29339
1	1	1		1	1	0.933333		1	1.5708	1.30964
1	1	0.883333		1	0.883333	0.775		1	1.22221	1.07658
1	1	0.891667		1	0.891667	0.7		1	1.2354	0.991157
1	1	0.816667		1	0.816667	0.916667		1	1.12832	1.27795
1	1	0.7		1	0.7	0.95		1	0.991157	1.34528
1	1	0.9		1	0.9	0.791667		1	1.24905	1.09681
1	1	0.841667		1	0.841667	0.883333		1	1.16156	1.22221
1	1	0.633333		1	0.633333	0.783333		1	0.920365	1.08663
1	1	0.633333		1	0.633333	0.766667		1	0.920365	1.06667
1	1	0.8		1	0.8	0.866667		1	1.10715	1.197
1	1	0.783333		1	0.783333	0.825		1	1.08663	1.13919
1	1	0.925		1	0.925	0.875		1	1.29339	1.20943
1	1	0.866667		1	0.866667	0.608333		1	1.197	0.894598
1	1	0.8		1	0.8	0.85		1	1.10715	1.1731
1	1	0.866667		1	0.866667	0.866667		1	1.197	1.197
1	1	0.816667		1	0.816667	0.741667		1	1.12832	1.03763
1	1	0.808333		1	0.808333	0.708333		1	1.11765	1.00029
1	1	0.983333		1	0.983333	0.375		1	1.44134	0.659058
1	1	0.741667		1	0.741667	0.875		1	1.03763	1.20943
1	1	0.816667		1	0.816667	0.925		1	1.12832	1.29339
1	1	0.9		1	0.9	0.725		1	1.24905	1.01878
1	1	0.716667		1	0.716667	0.933333		1	1.00949	1.30964
1	1	0.816667		1	0.816667	0.858333		1	1.12832	1.1849
1	1	0.833333		1	0.833333	0.783333		1	1.15026	1.08663
1	1	0.775		1	0.775	0.8		1	1.07658	1.10715
1	1	0.708333		1	0.708333	0.8		1	1.00029	1.10715
1	1	0.6		1	0.6	0.95		1	0.886077	1.34528
1	1	0.783333		1	0.783333	0.883333		1	1.08663	1.22221
1	1	0.816667		1	0.816667	0.908333		1	1.12832	1.2632
1	1	0.916667		1	0.916667	0.808333		1	1.27795	1.11765
1	1	0.791667		1	0.791667	1		1	1.09681	1.5708
1	1	0.966667		1	0.966667	0.683333		1	1.38719	0.97311
2	1	0.866667		2	0.866667	0.883333		2	1.197	1.22221
2	1	0.75		2	0.75	0.925		2	1.0472	1.29339
2	1	0.941667		2	0.941667	0.925		2	1.32686	1.29339
2	1	1		2	1	0.608333		2	1.5708	0.894598
2	1	0.358333		2	0.358333	0.716667		2	0.641764	1.00949
2	1	0.841667		2	0.841667	0.891667		2	1.16156	1.2354
2	1	0.875		2	0.875	0.616667		2	1.20943	0.90315
2	1	0.658333		2	0.658333	0.933333		2	0.946505	1.30964
2	1	0.916667		2	0.916667	0.875		2	1.27795	1.20943
2	1	0.733333		2	0.733333	0.891667		2	1.02816	1.2354
2	1	0.783333		2	0.783333	0.908333		2	1.08663	1.2632
2	1	0.841667		2	0.841667	0.883333		2	1.16156	1.22221
2	1	0.908333		2	0.908333	0.808333		2	1.2632	1.11765
2	1	0.8		2	0.8	0.841667		2	1.10715	1.16156
2	1	0.55		2	0.55	0.883333		2	0.835482	1.22221
2	1	0.925		2	0.925	0.85		2	1.29339	1.1731
2	1	1		2	1	0.808333		2	1.5708	1.11765
2	1	0.983333		2	0.983333	0.883333		2	1.44134	1.22221
2	1	0.891667		2	0.891667	0.775		2	1.2354	1.07658
2	1	0.875		2	0.875	0.866667		2	1.20943	1.197
2	1	0.908333		2	0.908333	0.891667		2	1.2632	1.2354
2	1	0.866667		2	0.866667	0.641667		2	1.197	0.929032
2	1	0.925		2	0.925	0.8		2	1.29339	1.10715
2	1	0.941667		2	0.941667	0.875		2	1.32686	1.20943
2	1	0.858333		2	0.858333	0.966667		2	1.1849	1.38719
2	1	0.908333		2	0.908333	0.925		2	1.2632	1.29339
2	1	0.825		2	0.825	0.941667		2	1.13919	1.32686
2	1	0.858333		2	0.858333	0.966667		2	1.1849	1.38719
2	1	0.85		2	0.85	0.858333		2	1.1731	1.1849
2	1	0.9		2	0.9	0.766667		2	1.24905	1.06667
2	1	0.75		2	0.75	0.825		2	1.0472	1.13919
2	1	0.633333		2	0.633333	0.983333		2	0.920365	1.44134
2	1	0.875		2	0.875	0.925		2	1.20943	1.29339
2	1	0.941667		2	0.941667	0.766667		2	1.32686	1.06667
2	1	0.825		2	0.825	0.691667		2	1.13919	0.982099
1	2	0.741667
1	2	0.416667
1	2	0.383333
1	2	0.783333
1	2	0.833333
1	2	0.708333
1	2	0.925
1	2	0.825
1	2	0.966667
1	2	0.908333
1	2	0.825
1	2	0.775
1	2	0.875
1	2	0.833333
1	2	0.866667
1	2	0.9
1	2	0.908333
1	2	0.883333
1	2	0.825
1	2	0.8
1	2	0.925
1	2	0.6
1	2	0.925
1	2	0.966667
1	2	0.808333
1	2	0.908333
1	2	0.808333
1	2	0.775
1	2	0.766667
1	2	0.891667
1	2	0.875
1	2	0.908333
1	2	0.466667
1	2	0.841667
1	2	0.883333
1	2	0.933333
1	2	0.575
1	2	0.741667
1	2	0.791667
1	2	0.775
1	2	0.883333
1	2	0.691667
1	2	0.891667
1	2	0.966667
1	2	0.783333
1	2	0.675
1	2	0.825
1	2	0.708333
1	2	0.841667
1	2	0.783333
1	2	0.791667
1	2	0.925
1	2	0.741667
1	2	0.841667
1	2	0.708333
1	2	0.833333
1	2	0.716667
1	2	0.966667
1	2	0.891667
1	2	0.833333
1	2	0.625
1	2	0.9
1	2	0.883333
1	2	0.733333
1	2	0.783333
1	2	0.866667
1	2	0.891667
1	2	0.95
1	2	0.783333
1	2	0.925
1	2	0.966667
1	2	0.933333
1	2	0.833333
1	2	0.85
1	2	0.325
1	2	0.841667
1	2	0.85
1	2	0.966667
1	2	0.958333
1	2	0.933333
1	2	0.641667
1	2	0.908333
1	2	0.933333
1	2	0.783333
1	2	0.641667
1	2	0.808333
1	2	0.708333
1	2	0.958333
1	2	0.8
1	2	0.966667
1	2	0.283333
1	2	0.858333
1	2	0.733333
1	2	0.6
1	2	0.966667
1	2	0.866667
1	2	0.558333
1	2	0.883333
1	2	0.75
1	2	0.783333
1	2	0.791667
1	2	0.733333
1	2	0.891667
1	2	0.966667
1	2	0.908333
1	2	0.733333
1	2	0.716667
1	2	0.875
1	2	0.741667
1	2	1
1	2	0.425
1	2	0.925
1	2	0.816667
1	2	0.875
1	2	0.841667
1	2	0.908333
1	2	0.65
1	2	0.666667
1	2	0.758333
1	2	0.966667
1	2	0.95
1	2	0.966667
1	2	0.691667
1	2	0.866667
1	2	0.966667
1	2	0.825
1	2	0.758333
1	2	0.825
1	2	0.658333
1	2	0.858333
1	2	0.75
1	2	0.558333
1	2	0.825
1	2	0.7
1	2	0.758333
1	2	0.691667
1	2	0.841667
1	2	0.75
1	2	0.908333
1	2	0.741667
1	2	0.841667
1	2	0.633333
1	2	0.916667
1	2	0.716667
1	2	0.925
1	2	0.55
1	2	0.85
1	2	0.891667
1	2	0.966667
1	2	0.825
1	2	0.808333
1	2	0.625
1	2	0.958333
1	2	0.875
1	2	0.85
1	2	0.891667
1	2	0.85
1	2	0.858333
1	2	0.775
1	2	0.925
1	2	0.933333
1	2	0.775
1	2	0.7
1	2	0.916667
1	2	0.95
1	2	0.791667
1	2	0.883333
1	2	0.783333
1	2	0.766667
1	2	0.866667
1	2	0.825
1	2	0.875
1	2	0.608333
1	2	0.85
1	2	0.866667
1	2	0.741667
1	2	0.708333
1	2	0.375
1	2	0.875
1	2	0.925
1	2	0.725
1	2	0.933333
1	2	0.858333
1	2	0.783333
1	2	0.8
1	2	0.8
1	2	0.95
1	2	0.883333
1	2	0.908333
1	2	0.808333
1	2	1
1	2	0.683333
2	2	0.883333
2	2	0.925
2	2	0.925
2	2	0.608333
2	2	0.716667
2	2	0.891667
2	2	0.616667
2	2	0.933333
2	2	0.875
2	2	0.891667
2	2	0.908333
2	2	0.883333
2	2	0.808333
2	2	0.841667
2	2	0.883333
2	2	0.85
2	2	0.808333
2	2	0.883333
2	2	0.775
2	2	0.866667
2	2	0.891667
2	2	0.641667
2	2	0.8
2	2	0.875
2	2	0.966667
2	2	0.925
2	2	0.941667
2	2	0.966667
2	2	0.858333
2	2	0.766667
2	2	0.825
2	2	0.983333
2	2	0.925
2	2	0.766667
2	2	0.691667
